# Supplementary material for: Prediction of the [4 + 2]- and [5 + 4]-cycloaddition reactions in zig-zag carbon nanotubes via an ambimodal transition state: density functional theory calculations
Source: Royal Society of Chemistry journal article supplement (doi:10.1039/c9ra10252c), 2020-01-01
Supplement: c9ra10252c1.pdf [file c9ra10252c1.pdf]

## Electronic supplementary information

### Prediction of [4+2]- and [5+4]-Cycloaddition reaction in Zig-Zag Carbon Nanotubes *Via* Ambimodal Transition State: A Density Functional Theory Calculations.

Akanksha Ashok Sangolkar and Ravinder Pawar\*,

Department of Chemistry, National Institute of Technology (NIT) Warangal, Telangana-506004, India.

ravinder\_pawar@nitw.ac.in

Table S1. Important Geometrical Parameters (Bond angle and dihedral angle)

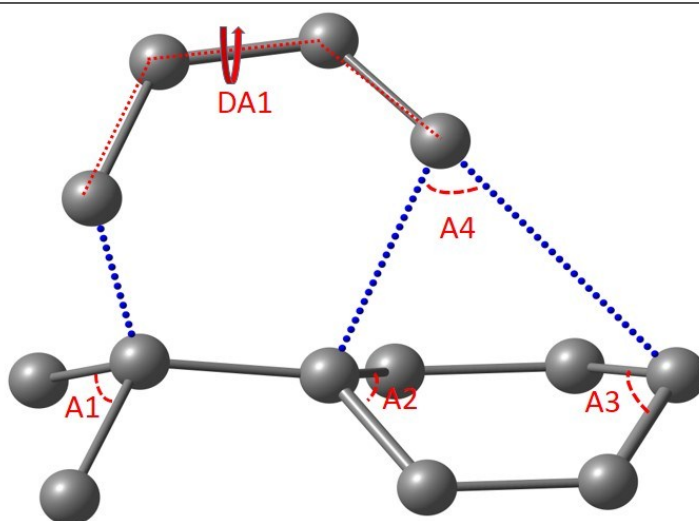

| System       | Bond Angle |        |        |       | Dihedral angle |
|--------------|------------|--------|--------|-------|----------------|
|              | A1         | A2     | A3     | A4    | DA1            |
| Butadiene    |            |        |        |       | -32.88         |
| (5,0)CNT     | 111.06     | 111.06 | 114.50 |       |                |
| (6,0)CNT     | 114.18     | 114.18 | 115.07 |       |                |
| (7,0)CNT     | 117.03     | 114.40 | 115.65 |       |                |
| (8,0)CNT     | 116.69     | 116.69 | 117.90 |       |                |
| (5,0)CNT -TS | 95.15      | 103.18 | 104.61 | 65.50 | -3.29          |
| (6,0)CNT -TS | 100.52     | 107.39 | 108.12 | 62.63 | 3.95           |
| (7,0)CNT -TS | 101.17     | 107.38 | 110.25 | 60.07 | 5.22           |
| (8,0)CNT -TS | 101.42     | 108.51 | 111.77 | 61.48 | -3.98          |

All the angles are in degree

**Table S2. Geometrical index ( $l_{x-y}$ ) as defined by Radomir Jasinski.**

| System   | [4+2]Cycloaddition |             |           | [5+4]Cycloaddition |             |           |
|----------|--------------------|-------------|-----------|--------------------|-------------|-----------|
|          | $r_{x-y}^{TS}$     | $r_{x-y}^P$ | $l_{x-y}$ | $r_{x-y}^{TS}$     | $r_{x-y}^P$ | $l_{x-y}$ |
| (5,0)CNT | 2.53               | 1.60        | 0.42      | 2.35               | 1.56        | 0.49      |
| (6,0)CNT | 2.82               | 1.61        | 0.25      | 2.38               | 1.57        | 0.48      |
| (7,0)CNT | 2.99               | 1.60        | 0.13      | 2.35               | 1.57        | 0.50      |
| (8,0)CNT | 3.01               | 1.60        | 0.12      | 2.49               | 1.57        | 0.41      |

All the distances are in Å

**Table S3. Calculated energetics of various cycloaddition reactions.**

| System   | TSs                 |                     |                     | [4+2]Cycloaddition |              |              | [5+4]Cycloaddition |              |              |
|----------|---------------------|---------------------|---------------------|--------------------|--------------|--------------|--------------------|--------------|--------------|
|          | $\Delta E^\ddagger$ | $\Delta H^\ddagger$ | $\Delta G^\ddagger$ | $\Delta E_r$       | $\Delta H_r$ | $\Delta G_r$ | $\Delta H_r$       | $\Delta G_r$ | $\Delta E_r$ |
| (5,0)CNT | -8.29               | -5.78               | 10.85               | -52.84             | -48.25       | -31.34       | -51.43             | -46.45       | -29.45       |
| (6,0)CNT | 10.40               | 10.99               | 26.49               | -21.90             | -19.41       | -3.48        | -39.79             | -36.02       | -19.76       |
| (7,0)CNT | 21.73               | 22.35               | 38.27               | -9.54              | -6.84        | 9.89         | -23.62             | -19.94       | -2.85        |
| (8,0)CNT | 35.64               | 35.59               | 50.64               | 7.61               | 9.46         | 25.01        | -16.21             | -13.02       | 2.89         |

All the energies are in kcal/mol.

**Table S4. Calculated energetics of various cycloaddition reaction of (5,0)CNT of different length with 1,3-butadiene.**

| Tube length<br>in (Å) | TSs                 |                     |                     | [4+2]Cycloaddition |              |              | [5+4]Cycloaddition |              |              |
|-----------------------|---------------------|---------------------|---------------------|--------------------|--------------|--------------|--------------------|--------------|--------------|
|                       | $\Delta E^\ddagger$ | $\Delta H^\ddagger$ | $\Delta G^\ddagger$ | $\Delta E_r$       | $\Delta H_r$ | $\Delta G_r$ | $\Delta E_r$       | $\Delta H_r$ | $\Delta G_r$ |
| <b>9.25</b>           | -8.29               | -5.78               | 10.85               | -52.84             | -48.25       | -31.34       | -51.43             | -46.45       | -29.45       |
| <b>11.34</b>          | -4.10               | -2.22               | 14.35               | -46.23             | -42.23       | -25.39       | -48.28             | -43.86       | -26.84       |
| <b>13.49</b>          | -3.31               | -0.82               | 16.45               | -43.96             | -39.33       | -21.80       | -47.53             | -42.37       | -24.65       |
| <b>15.63</b>          | 4.46                | 7.37                | 24.64               | -35.21             | -30.16       | -12.57       | -40.18             | -34.46       | -16.55       |

All the energies are in kcal/mol.

**Table S5. Energetics obtained in gas-phase and using different solvents.**

| System                            | TS                  |                     |                     | [4+2]Cycloaddition |              |              | [5+4]Cycloaddition |              |              |
|-----------------------------------|---------------------|---------------------|---------------------|--------------------|--------------|--------------|--------------------|--------------|--------------|
|                                   | $\Delta E^\ddagger$ | $\Delta H^\ddagger$ | $\Delta G^\ddagger$ | $\Delta E_r$       | $\Delta H_r$ | $\Delta G_r$ | $\Delta E_r$       | $\Delta H_r$ | $\Delta G_r$ |
| <b>(5,0)CNT of 9.25 Å length</b>  |                     |                     |                     |                    |              |              |                    |              |              |
| <b>A</b>                          | -8.29               | -5.78               | 10.85               | -52.84             | -48.25       | -31.34       | -51.43             | -46.45       | -29.45       |
| <b>B</b>                          | -6.56               | -3.92               | 12.83               | -51.26             | -46.58       | -29.57       | -49.69             | -44.55       | -27.40       |
| <b>C</b>                          | -6.99               | -3.59               | 12.12               | -51.67             | -46.16       | -30.06       | -49.37             | -43.37       | -27.13       |
| <b>(6,0)CNT of 9.25 Å length</b>  |                     |                     |                     |                    |              |              |                    |              |              |
| <b>A</b>                          | 10.40               | 10.99               | 26.49               | -21.90             | -19.41       | -3.48        | -39.79             | -36.02       | -19.76       |
| <b>B</b>                          | 10.63               | 11.57               | 27.22               | -21.51             | -18.71       | -2.57        | -39.00             | -34.82       | -18.27       |
| <b>C</b>                          | 6.51                | 8.11                | 24.83               | -24.81             | -21.47       | -4.30        | -40.77             | -36.01       | -18.40       |
| <b>(5,0)CNT of 11.34 Å length</b> |                     |                     |                     |                    |              |              |                    |              |              |
| <b>A</b>                          | -4.10               | -2.22               | 14.35               | -46.23             | -42.23       | -25.39       | -48.28             | -43.86       | -26.84       |
| <b>B</b>                          | -1.48               | 0.32                | 16.87               | -43.77             | -39.88       | -23.08       | -45.64             | -41.29       | -24.32       |
| <b>C</b>                          | -0.97               | 0.82                | 16.81               | -43.16             | -39.12       | -22.75       | -44.20             | -39.84       | -23.31       |

All the energies are in kcal/mol

**A** are in gas-phase

**B** are in Toluene solvent

**C** are in Acetonitrile solvent

### **Periodic calculations:**

The nanotube super cells were constructed from the B3LYP-D3 optimized geometries. The new super-cells were re-optimized using DFT with generalized gradient approximation (GGA) of Perdew, Burke, and Ernzerhof (PBE) method. An ultra-soft pseudo-potential description of the electron-electron interaction was used with valence electrons  $2s^2, 2p^4$  and  $1s^1$  of C and H atoms, respectively. A 50 Ry wave function and a 250 Ry charge density cut-off were taken into account. One-dimensional (1-D) periodic boundary conditions (PBCs) were applied along with the tube axis (Y-axis) to simulate infinitely long alternating nanotube systems. The minimum distance kept between periodic images (in x, and z-axis) is  $\sim 20 \text{ \AA}$  to minimize the interactions between periodic images. A Brillouin zone sampling was considered on a Gamma centred  $1 \times 8 \times 1$  grid. Geometry optimization was performed to relax both ions and lattices until the total energy variation was less than  $10^{-6} \text{ eV}$ . All these calculations were performed using Quantum espresso program package.<sup>1</sup>

### **Periodic calculations**

The periodic calculations were performed to explore the stability of [4+2] and [5+4] products. Periodic structure analysis clearly indicates the formation of [4+2] cycloadduct is more favourable when compared with corresponding [5+4] counterpart. Typically, calculated energy difference ( $\Delta E = E_{[5+4]} - E_{[4+2]}$ ) for (6,0)CNT is 113.07 kcal/mol. Therefore, it is interesting to mention that the terminal carbon reactivity plays vital role in the formation of [5+4] cyclic adducts.

<sup>1</sup>P. Giannozzi, S. Baroni, N. Bonini, M. Calandra, R. Car, et al. J.Phys.:Condens.Matter 21, 395502 (2009) <http://dx.doi.org/10.1088/0953-8984/21/39/395502>

## Role of basis set

To understand the role of single basis set vs multiple basis set, in the present investigation the calculations were performed using B3LYP-D3/6-31+G\* and B3LYP-D3/6-311++G\*\* level of theories. The geometries of various point structure change only marginally when compared both above mentioned methods. Calculated energetics of cycloaddition reaction of (7,0)CNT with butadiene using above mentioned methods are depicted in Figure S3.

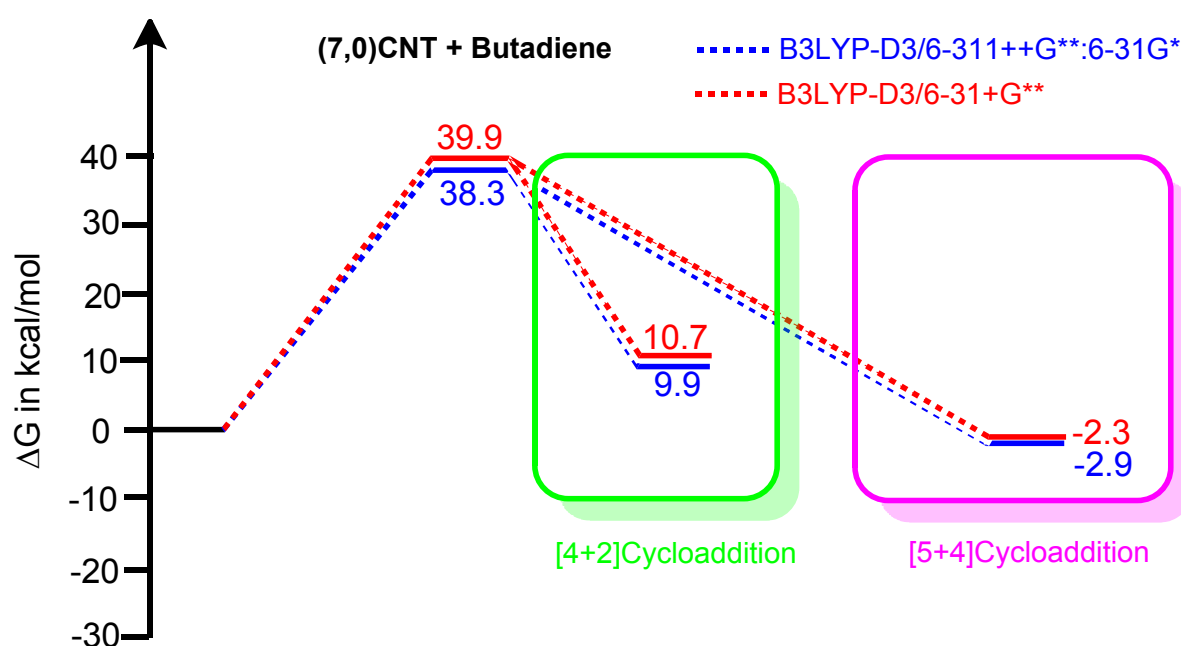

**Figure S1.** Relative energy profile of (7,0)CNT with 1,3-butadiene using B3LYP-D3 method employing 6-31+G\*\* and 6-311++G\*\*:<sup>6</sup>-31G\* basis sets.

It can be noted that energetics of TS and both products change marginally. Typically calculated  $\Delta\Delta G_{TS}$  ( $\Delta G_{TS}$  B3LYP-D3/6-311++G\*\*:<sup>6</sup>-31G\* -  $\Delta G_{TS}$  B3LYP-D3/6-31+G\*),  $\Delta\Delta G_{[4+2]}$  ( $\Delta G_{[4+2]}$  B3LYP-D3/6-311++G\*\*:<sup>6</sup>-31G\* -  $\Delta G_{[4+2]}$  B3LYP-D3/6-31+G\*) and  $\Delta\Delta G_{[5+4]}$  ( $\Delta G_{[5+4]}$  B3LYP-D3/6-311++G\*\*:<sup>6</sup>-31G\* -  $\Delta G_{[5+4]}$  B3LYP-D3/6-31+G\*) is 1.6, 0.8, and 0.6 kcal, respectively. It is interesting to note that change in the energies obtained from different level of theory for products ([4+2] and [5+4]) is comparable with kT value. Therefore, in the present investigation B3LYP-D3/6-311++G\*\*:<sup>6</sup>-31G\* level of theory utilized for all other calculations.

## Biradical formation

With reference to **scheme 2** of Text, biradical formation is unavoidable situation in during [5+4]-cycloaddition reaction. Although it is not shown in the case of [4+2] cycloaddition the same intermediate formation can be assumed. Therefore, the unrestricted calculations were also performed using UB3LYP-D3, U $\omega$ B97XD and UM06-2X level of theory. Calculated free energy profiles using different methods considering both singlet and triplet transition states and products are given here.

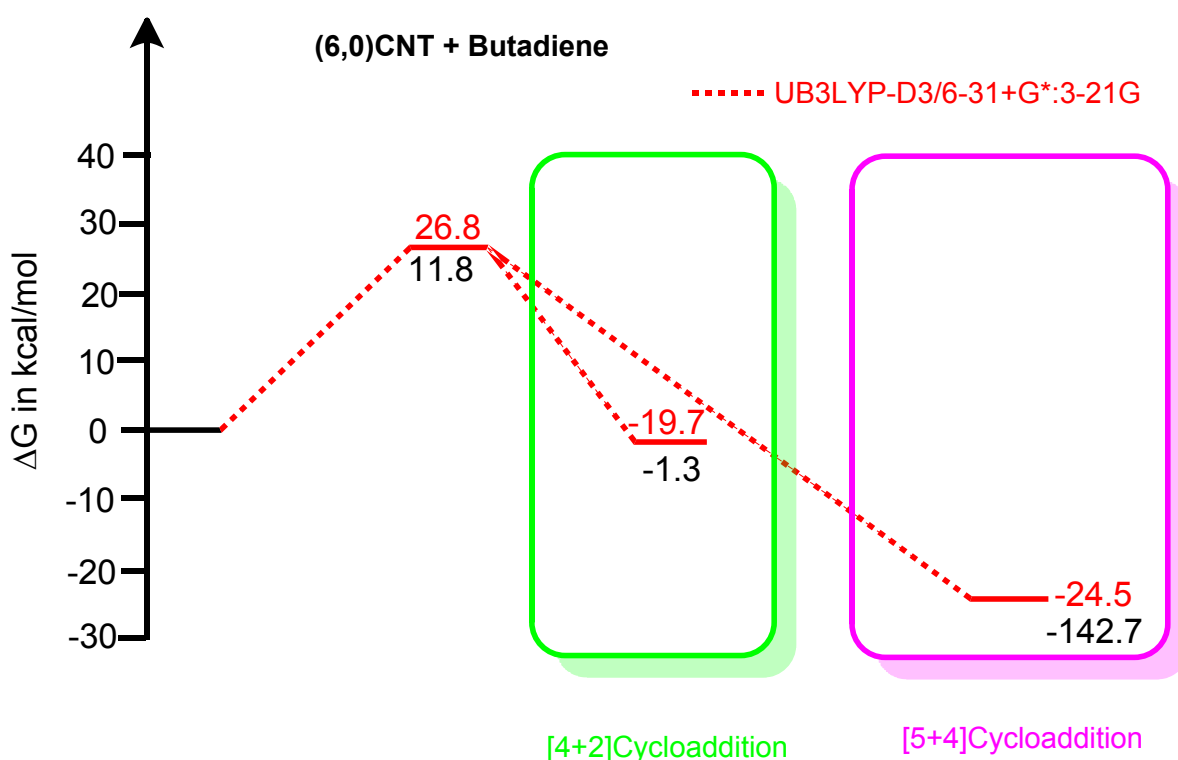

**Figure S2.** Relative energy profile of (6,0)CNT with 1,3-butadiene using UB3LYP-D3 method employing 6-31+G\*:3-21G\* basis sets (The values given in red and black color are obtained by considering corresponding state as singlet and triplet).

It is interesting to observe that the stability of triplet ambimodal transition state is more when compared with the singlet counterpart. Further, it can also be noted from the above figure that the singlet [4+2]-cycloadduct is more stable when compared with the stability of triplet [4+2]-cyclic adduct. The [5+4]-cyclic adduct energetically more stable one and significant stability attained in its triplet ground state. The energy difference of singlet and triplet [5+4]-cycloadduct is 118.2 kcal/mol. thus DFT based calculation indicates the [5+4]-cycloadduct is a biradical with triplet ground state.

## IRC calculations

As it can be seen from the geometries of various reactant, transition structures and products that change in basis set and inclusion of dispersion in B3LYP influences only marginally. Therefore, the intrinsic reaction coordination calculation carried out using B3LYP-D3/6-31G\* level of calculation. Calculated IRC plots are shown in Figure S3.

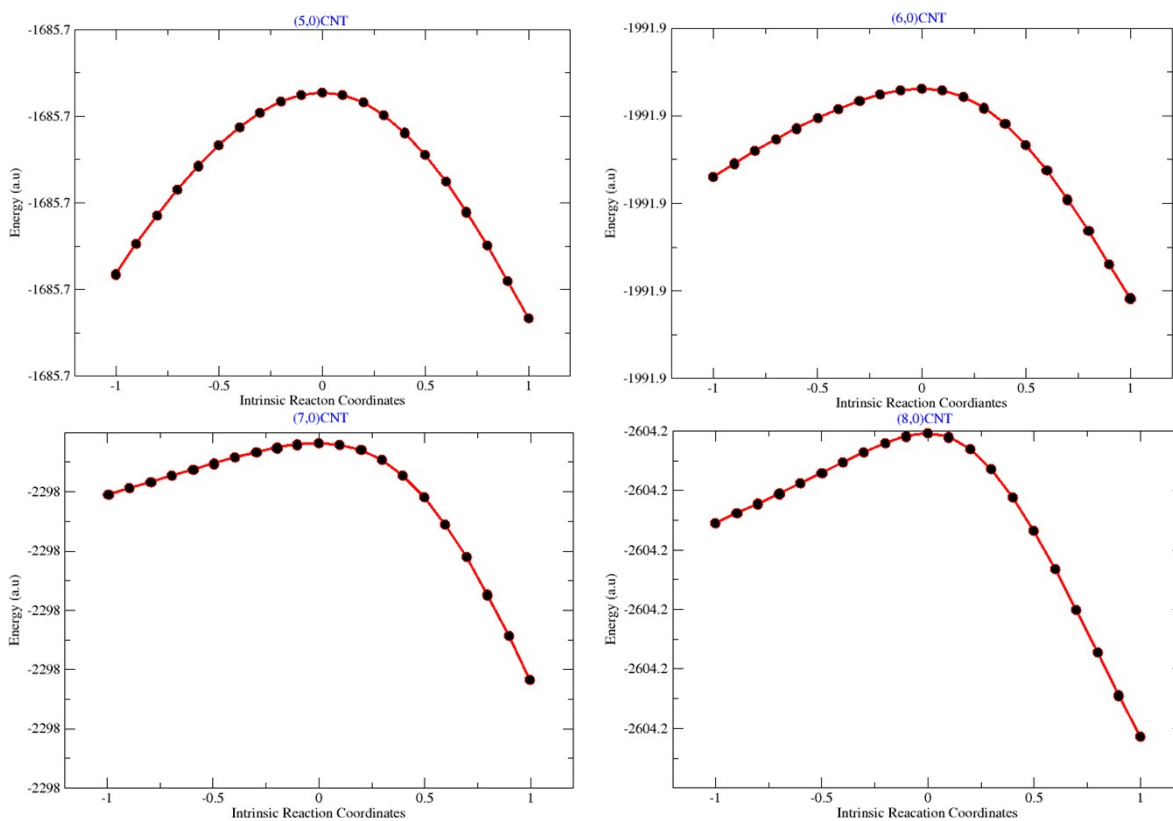

**Figure S3.** Intrinsic reaction coordinates obtained using various transition structure (Calculations were carried out using B3LYP-D3/6-31G\* level of calculations).

# PES

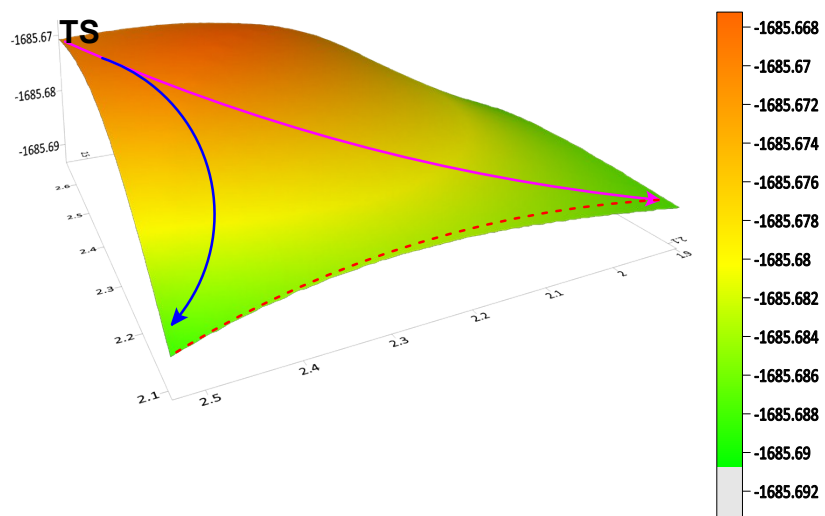

**Figure S4.** Potential energy surface bifurcation.



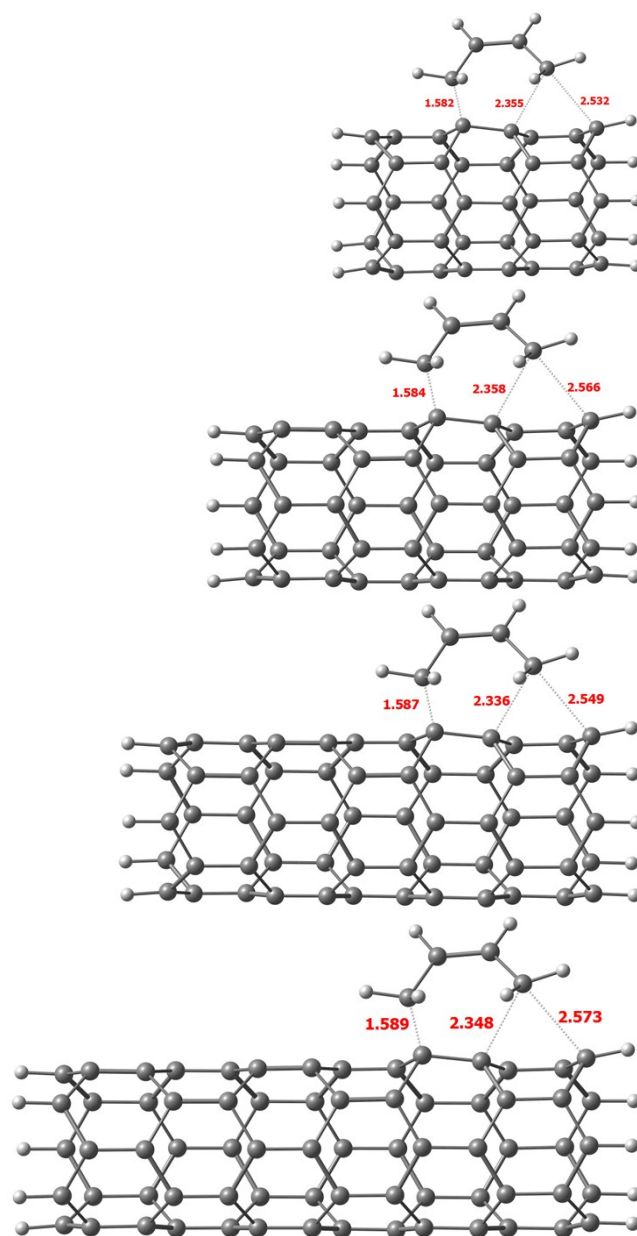

**Figure S5.** Optimized geometries of TSs involved in DA reaction of different length (5,0)CNT with 1,3-butadiene. (colour key: Gary = Carbon and White = Hydrogen atoms).

The results given here are calculated using B3LYP-D3 employing combined 6-311++G\*\* and 6-31G\* basis sets. Further, the all these were optimized with singlet ground state configuration.

### Optimized Geometries of pristine tubes with tube length 9.5 Å

#### (5,0)CNT

|   |              |              |              |
|---|--------------|--------------|--------------|
| 6 | -1.144578000 | 3.540990000  | 1.636281000  |
| 6 | 0.000000000  | 2.826646000  | 2.117703000  |
| 6 | -1.200557000 | 0.698721000  | 1.696811000  |
| 6 | 0.000000000  | 1.413792000  | 2.126816000  |
| 6 | -1.200557000 | -0.698721000 | 1.696811000  |
| 6 | 0.000000000  | -1.413792000 | 2.126816000  |
| 6 | -1.144578000 | -3.540990000 | 1.636281000  |
| 6 | 0.000000000  | -2.826646000 | 2.117703000  |
| 6 | -1.859059000 | 3.546674000  | -0.627364000 |
| 6 | -1.890144000 | 2.854857000  | 0.616930000  |
| 6 | -1.906962000 | 0.707968000  | -0.607365000 |
| 6 | -1.890474000 | 1.423544000  | 0.632806000  |
| 6 | -1.906962000 | -0.707968000 | -0.607365000 |
| 6 | -1.890474000 | -1.423544000 | 0.632806000  |
| 6 | -1.859059000 | -3.546674000 | -0.627364000 |
| 6 | -1.890144000 | -2.854857000 | 0.616930000  |
| 6 | 0.000000000  | 3.534129000  | -2.148230000 |
| 6 | -1.175737000 | 2.854679000  | -1.672582000 |
| 6 | 0.000000000  | 0.701571000  | -2.069894000 |
| 6 | -1.175576000 | 1.429910000  | -1.639443000 |
| 6 | 0.000000000  | -0.701571000 | -2.069894000 |
| 6 | -1.175576000 | -1.429910000 | -1.639443000 |
| 6 | 0.000000000  | -3.534129000 | -2.148230000 |
| 6 | -1.175737000 | -2.854679000 | -1.672582000 |
| 6 | 1.859059000  | 3.546674000  | -0.627364000 |
| 6 | 1.175737000  | 2.854679000  | -1.672582000 |
| 6 | 1.906962000  | 0.707968000  | -0.607365000 |
| 6 | 1.175576000  | 1.429910000  | -1.639443000 |
| 6 | 1.906962000  | -0.707968000 | -0.607365000 |
| 6 | 1.175576000  | -1.429910000 | -1.639443000 |
| 6 | 1.859059000  | -3.546674000 | -0.627364000 |
| 6 | 1.175737000  | -2.854679000 | -1.672582000 |
| 6 | 1.144578000  | 3.540990000  | 1.636281000  |
| 6 | 1.890144000  | 2.854857000  | 0.616930000  |
| 6 | 1.200557000  | 0.698721000  | 1.696811000  |
| 6 | 1.890474000  | 1.423544000  | 0.632806000  |
| 6 | 1.200557000  | -0.698721000 | 1.696811000  |
| 6 | 1.890474000  | -1.423544000 | 0.632806000  |
| 6 | 1.144578000  | -3.540990000 | 1.636281000  |
| 6 | 1.890144000  | -2.854857000 | 0.616930000  |
| 1 | -1.178156000 | 4.625637000  | 1.694235000  |

|   |              |              |              |
|---|--------------|--------------|--------------|
| 1 | 1.178156000  | 4.625637000  | 1.694235000  |
| 1 | -1.848620000 | 4.633346000  | -0.626798000 |
| 1 | 1.848620000  | 4.633346000  | -0.626798000 |
| 1 | 0.000000000  | 4.618131000  | -2.159330000 |
| 1 | -1.178156000 | -4.625637000 | 1.694235000  |
| 1 | 1.178156000  | -4.625637000 | 1.694235000  |
| 1 | -1.848620000 | -4.633346000 | -0.626798000 |
| 1 | 1.848620000  | -4.633346000 | -0.626798000 |
| 1 | 0.000000000  | -4.618131000 | -2.159330000 |

Zero-point correction= 0.345391 (Hartree/Particle)  
 Thermal correction to Energy= 0.364905  
 Thermal correction to Enthalpy= 0.365849  
 Thermal correction to Gibbs Free Energy= 0.302310  
 Sum of electronic and zero-point Energies= -1529.513374  
 Sum of electronic and thermal Energies= -1529.493861  
 Sum of electronic and thermal Enthalpies= -1529.492917  
**Sum of electronic and thermal Free Energies= -1529.556455**  
**Number of imaginary frequencies = 0**

#### (6,0)CNT

|   |              |              |              |
|---|--------------|--------------|--------------|
| 6 | 3.550345000  | -0.424005000 | -2.381806000 |
| 6 | 2.868132000  | 0.816254000  | -2.257232000 |
| 6 | 0.716783000  | -0.421887000 | -2.363627000 |
| 6 | 1.425257000  | 0.816781000  | -2.261333000 |
| 6 | -0.719019000 | -0.421889000 | -2.363637000 |
| 6 | -1.427489000 | 0.816786000  | -2.261347000 |
| 6 | -3.552599000 | -0.423989000 | -2.381720000 |
| 6 | -2.870358000 | 0.816264000  | -2.257262000 |
| 6 | 3.550305000  | -2.275228000 | -0.822852000 |
| 6 | 2.868308000  | -1.544550000 | -1.833264000 |
| 6 | 0.716772000  | -2.255770000 | -0.815853000 |
| 6 | 1.425467000  | -1.547687000 | -1.836887000 |
| 6 | -0.719010000 | -2.255777000 | -0.815856000 |
| 6 | -1.427700000 | -1.547696000 | -1.836899000 |
| 6 | -3.552561000 | -2.275130000 | -0.822817000 |
| 6 | -2.870534000 | -1.544569000 | -1.833291000 |
| 6 | 3.550412000  | -1.849468000 | 1.559536000  |
| 6 | 2.868360000  | -2.360830000 | 0.421397000  |
| 6 | 0.716808000  | -1.836152000 | 1.546645000  |
| 6 | 1.425526000  | -2.365528000 | 0.422099000  |
| 6 | -0.719045000 | -1.836159000 | 1.546652000  |
| 6 | -1.427759000 | -2.365539000 | 0.422101000  |
| 6 | -3.552668000 | -1.849400000 | 1.559480000  |
| 6 | -2.870588000 | -2.360856000 | 0.421403000  |
| 6 | 3.547692000  | 0.427638000  | 2.383379000  |
| 6 | 2.868129000  | -0.816783000 | 2.257063000  |
| 6 | 0.717098000  | 0.420405000  | 2.362347000  |
| 6 | 1.425255000  | -0.819053000 | 2.260520000  |
| 6 | -0.719334000 | 0.420407000  | 2.362356000  |

|   |              |              |              |
|---|--------------|--------------|--------------|
| 6 | -1.427486000 | -0.819058000 | 2.260533000  |
| 6 | -3.549945000 | 0.427617000  | 2.383285000  |
| 6 | -2.870355000 | -0.816793000 | 2.257093000  |
| 6 | 3.544435000  | 2.275467000  | 0.822941000  |
| 6 | 2.865087000  | 1.543131000  | 1.831530000  |
| 6 | 0.716040000  | 2.250208000  | 0.813806000  |
| 6 | 1.423647000  | 1.542612000  | 1.832616000  |
| 6 | -0.718276000 | 2.250219000  | 0.813811000  |
| 6 | -1.425879000 | 1.542619000  | 1.832626000  |
| 6 | -3.546689000 | 2.275374000  | 0.822908000  |
| 6 | -2.867311000 | 1.543147000  | 1.831551000  |
| 6 | 3.547792000  | 1.853224000  | -1.558392000 |
| 6 | 2.865154000  | 2.358700000  | -0.421001000 |
| 6 | 0.717119000  | 1.834194000  | -1.546638000 |
| 6 | 1.423707000  | 2.359016000  | -0.422144000 |
| 6 | -0.719355000 | 1.834201000  | -1.546643000 |
| 6 | -1.425939000 | 2.359025000  | -0.422145000 |
| 6 | -3.550047000 | 1.853147000  | -1.558332000 |
| 6 | -2.867379000 | 2.358721000  | -0.421004000 |
| 1 | 4.637365000  | -1.823942000 | 1.538771000  |
| 1 | 4.637229000  | -2.243938000 | -0.811650000 |
| 1 | 4.634795000  | 0.425997000  | 2.349856000  |
| 1 | 4.637345000  | -0.417751000 | -2.350476000 |
| 1 | 4.628995000  | 2.249206000  | 0.813576000  |
| 1 | 4.634840000  | 1.829743000  | -1.532927000 |
| 1 | -4.639619000 | -1.823917000 | 1.538754000  |
| 1 | -4.639483000 | -2.243897000 | -0.811637000 |
| 1 | -4.637047000 | 0.425989000  | 2.349821000  |
| 1 | -4.639598000 | -0.417744000 | -2.350444000 |
| 1 | -4.631248000 | 2.249176000  | 0.813568000  |
| 1 | -4.637094000 | 1.829715000  | -1.532909000 |

Zero-point correction= 0.422345 (Hartree/Particle)  
 Thermal correction to Energy= 0.445295  
 Thermal correction to Enthalpy= 0.446240  
 Thermal correction to Gibbs Free Energy= 0.376975  
 Sum of electronic and zero-point Energies= -1835.667092  
 Sum of electronic and thermal Energies= -1835.644142  
 Sum of electronic and thermal Enthalpies= -1835.643197  
**Sum of electronic and thermal Free Energies= -1835.712462**  
**Number of imaginary frequencies = 0**

#### (7,0)CNT

|   |              |             |             |
|---|--------------|-------------|-------------|
| 1 | 4.670160000  | 1.722591000 | 2.159847000 |
| 6 | 2.927197000  | 2.486948000 | 1.153187000 |
| 6 | 3.584602000  | 1.774288000 | 2.195668000 |
| 6 | 1.482059000  | 2.489884000 | 1.140284000 |
| 6 | 0.750513000  | 1.760204000 | 2.128039000 |
| 6 | -1.371825000 | 2.593280000 | 1.161817000 |
| 6 | -0.678200000 | 1.797490000 | 2.133113000 |

|   |              |              |              |
|---|--------------|--------------|--------------|
| 6 | -2.809549000 | 2.581894000  | 1.168132000  |
| 6 | -3.512080000 | 1.820247000  | 2.145529000  |
| 1 | -4.599666000 | 1.821896000  | 2.123820000  |
| 1 | 4.684949000  | 2.741586000  | -0.061228000 |
| 6 | 2.916434000  | 2.439234000  | -1.248520000 |
| 6 | 3.599236000  | 2.797828000  | -0.056584000 |
| 6 | 1.469928000  | 2.444290000  | -1.262097000 |
| 6 | 0.762491000  | 2.767544000  | -0.066385000 |
| 6 | -1.378117000 | 2.547569000  | -1.275266000 |
| 6 | -0.667153000 | 2.807435000  | -0.060346000 |
| 6 | -2.813970000 | 2.537685000  | -1.259667000 |
| 6 | -3.499584000 | 2.797896000  | -0.047370000 |
| 1 | -4.587315000 | 2.779427000  | -0.044630000 |
| 1 | 4.661853000  | 1.619162000  | -2.215856000 |
| 6 | 2.866656000  | 0.529894000  | -2.726459000 |
| 6 | 3.575461000  | 1.659927000  | -2.230614000 |
| 6 | 1.423649000  | 0.534807000  | -2.742598000 |
| 6 | 0.736963000  | 1.673673000  | -2.219812000 |
| 6 | -1.420452000 | 0.599322000  | -2.732662000 |
| 6 | -0.691395000 | 1.713810000  | -2.214347000 |
| 6 | -2.863105000 | 0.598048000  | -2.716063000 |
| 6 | -3.526216000 | 1.724119000  | -2.182149000 |
| 1 | -4.613483000 | 1.728096000  | -2.151248000 |
| 1 | 4.616214000  | -0.731830000 | -2.654972000 |
| 6 | 2.816156000  | -1.827827000 | -2.157284000 |
| 6 | 3.528994000  | -0.715757000 | -2.682898000 |
| 6 | 1.379927000  | -1.830723000 | -2.175805000 |
| 6 | 0.693893000  | -0.693150000 | -2.708900000 |
| 6 | -1.467956000 | -1.741130000 | -2.127684000 |
| 6 | -0.734558000 | -0.653696000 | -2.700276000 |
| 6 | -2.914507000 | -1.740989000 | -2.113098000 |
| 6 | -3.573013000 | -0.635189000 | -2.703851000 |
| 1 | -4.659456000 | -0.603159000 | -2.675801000 |
| 1 | 4.587677000  | -2.535163000 | -1.137910000 |
| 6 | 2.808147000  | -2.837623000 | 0.051041000  |
| 6 | 3.499918000  | -2.549908000 | -1.148901000 |
| 6 | 1.370929000  | -2.845548000 | 0.040594000  |
| 6 | 0.667650000  | -2.552700000 | -1.166415000 |
| 6 | -1.482806000 | -2.739030000 | 0.058625000  |
| 6 | -0.762095000 | -2.512896000 | -1.158114000 |
| 6 | -2.927876000 | -2.740592000 | 0.071899000  |
| 6 | -3.599056000 | -2.541975000 | -1.161779000 |
| 1 | -4.684853000 | -2.489617000 | -1.145459000 |
| 1 | 4.597762000  | -2.517763000 | 1.231521000  |
| 6 | 2.844934000  | -1.720718000 | 2.201317000  |
| 6 | 3.510131000  | -2.524118000 | 1.250386000  |
| 6 | 1.400670000  | -1.721710000 | 2.190740000  |
| 6 | 0.676586000  | -2.499856000 | 1.247753000  |
| 6 | -1.451925000 | -1.647569000 | 2.195105000  |
| 6 | -0.752236000 | -2.462928000 | 1.255971000  |

|   |              |              |             |
|---|--------------|--------------|-------------|
| 6 | -2.898176000 | -1.651968000 | 2.208510000 |
| 6 | -3.586176000 | -2.502322000 | 1.311601000 |
| 1 | -4.671774000 | -2.441565000 | 1.298916000 |
| 1 | 4.629012000  | -0.639175000 | 2.732079000 |
| 6 | 2.895659000  | 0.638419000  | 2.681765000 |
| 6 | 3.544667000  | -0.620766000 | 2.761266000 |
| 6 | 1.449263000  | 0.639135000  | 2.667994000 |
| 6 | 0.711151000  | -0.580092000 | 2.705896000 |
| 6 | -1.403311000 | 0.708962000  | 2.689031000 |
| 6 | -0.713590000 | -0.542578000 | 2.712744000 |
| 6 | -2.847909000 | 0.704146000  | 2.699221000 |
| 6 | -3.546991000 | -0.527311000 | 2.781935000 |
| 1 | -4.631306000 | -0.498327000 | 2.761618000 |

Zero-point correction= 0.493216 (Hartree/Particle)  
 Thermal correction to Energy= 0.521140  
 Thermal correction to Enthalpy= 0.522084  
 Thermal correction to Gibbs Free Energy= 0.442953  
 Sum of electronic and zero-point Energies= -2141.773530  
 Sum of electronic and thermal Energies= -2141.745605  
 Sum of electronic and thermal Enthalpies= -2141.744661  
**Sum of electronic and thermal Free Energies= -2141.823793**  
**Number of imaginary frequencies = 0**

#### (8,0)CNT

|   |              |              |              |
|---|--------------|--------------|--------------|
| 6 | 1.219547000  | 2.943654000  | 3.551003000  |
| 6 | 0.000473000  | 3.163429000  | 2.872154000  |
| 6 | 1.207547000  | 2.914764000  | 0.718732000  |
| 6 | -0.000420000 | 3.159445000  | 1.426171000  |
| 6 | 1.207547000  | 2.914764000  | -0.718732000 |
| 6 | -0.000420000 | 3.159445000  | -1.426171000 |
| 6 | 1.219547000  | 2.943654000  | -3.551003000 |
| 6 | 0.000473000  | 3.163429000  | -2.872154000 |
| 6 | 2.942525000  | 1.222370000  | 3.554811000  |
| 6 | 2.237707000  | 2.238197000  | 2.872156000  |
| 6 | 2.920622000  | 1.210213000  | 0.719619000  |
| 6 | 2.235478000  | 2.234719000  | 1.426049000  |
| 6 | 2.920622000  | 1.210213000  | -0.719619000 |
| 6 | 2.235478000  | 2.234719000  | -1.426049000 |
| 6 | 2.942525000  | 1.222370000  | -3.554811000 |
| 6 | 2.237707000  | 2.238197000  | -2.872156000 |
| 6 | 2.942635000  | -1.218160000 | 3.557147000  |
| 6 | 3.167276000  | 0.000321000  | 2.875224000  |
| 6 | 2.921706000  | -1.210395000 | 0.719460000  |
| 6 | 3.166830000  | -0.000310000 | 1.427807000  |
| 6 | 2.921706000  | -1.210395000 | -0.719460000 |
| 6 | 3.166830000  | -0.000310000 | -1.427807000 |
| 6 | 2.942635000  | -1.218160000 | -3.557147000 |
| 6 | 3.167276000  | 0.000321000  | -2.875224000 |
| 6 | 1.218856000  | -2.943084000 | 3.556836000  |

|   |              |              |              |
|---|--------------|--------------|--------------|
| 6 | 2.238448000  | -2.238540000 | 2.875400000  |
| 6 | 1.209783000  | -2.920618000 | 0.719360000  |
| 6 | 2.238744000  | -2.238721000 | 1.427951000  |
| 6 | 1.209783000  | -2.920618000 | -0.719360000 |
| 6 | 2.238744000  | -2.238721000 | -1.427951000 |
| 6 | 1.218856000  | -2.943084000 | -3.556836000 |
| 6 | 2.238448000  | -2.238540000 | -2.875400000 |
| 6 | -1.219863000 | -2.944679000 | 3.556543000  |
| 6 | -0.000382000 | -3.166396000 | 2.875049000  |
| 6 | -1.210154000 | -2.921233000 | 0.719262000  |
| 6 | -0.000167000 | -3.165685000 | 1.427832000  |
| 6 | -1.210154000 | -2.921233000 | -0.719262000 |
| 6 | -0.000167000 | -3.165685000 | -1.427832000 |
| 6 | -1.219863000 | -2.944679000 | -3.556543000 |
| 6 | -0.000382000 | -3.166396000 | -2.875049000 |
| 6 | -2.943035000 | -1.219394000 | 3.556840000  |
| 6 | -2.239554000 | -2.239971000 | 2.875090000  |
| 6 | -2.920737000 | -1.209925000 | 0.719362000  |
| 6 | -2.239200000 | -2.239315000 | 1.427747000  |
| 6 | -2.920737000 | -1.209925000 | -0.719362000 |
| 6 | -2.239200000 | -2.239315000 | -1.427747000 |
| 6 | -2.943035000 | -1.219394000 | -3.556840000 |
| 6 | -2.239554000 | -2.239971000 | -2.875090000 |
| 6 | -2.942347000 | 1.219521000  | 3.557121000  |
| 6 | -3.164967000 | -0.000123000 | 2.875358000  |
| 6 | -2.922005000 | 1.210187000  | 0.719458000  |
| 6 | -3.165302000 | -0.000042000 | 1.428041000  |
| 6 | -2.922005000 | 1.210187000  | -0.719458000 |
| 6 | -3.165302000 | -0.000042000 | -1.428041000 |
| 6 | -2.942347000 | 1.219521000  | -3.557121000 |
| 6 | -3.164967000 | -0.000123000 | -2.875358000 |
| 6 | -1.216377000 | 2.944439000  | 3.554840000  |
| 6 | -2.240140000 | 2.240383000  | 2.875249000  |
| 6 | -1.209474000 | 2.920444000  | 0.719619000  |
| 6 | -2.240256000 | 2.239624000  | 1.427702000  |
| 6 | -1.209474000 | 2.920444000  | -0.719619000 |
| 6 | -2.240256000 | 2.239624000  | -1.427702000 |
| 6 | -1.216377000 | 2.944439000  | -3.554840000 |
| 6 | -2.240140000 | 2.240383000  | -2.875249000 |
| 1 | 1.209169000  | -2.919832000 | -4.643953000 |
| 1 | 2.920131000  | -1.208275000 | -4.644356000 |
| 1 | -1.210040000 | -2.921090000 | -4.643642000 |
| 1 | 2.916407000  | 1.216233000  | -4.642232000 |
| 1 | -2.919786000 | -1.209753000 | -4.643957000 |
| 1 | 1.212098000  | 2.925398000  | -4.635931000 |
| 1 | -2.919366000 | 1.210566000  | -4.644331000 |
| 1 | -1.202406000 | 2.921638000  | -4.642257000 |
| 1 | 1.209169000  | -2.919832000 | 4.643953000  |
| 1 | 2.920131000  | -1.208275000 | 4.644356000  |
| 1 | -1.210040000 | -2.921090000 | 4.643642000  |

|   |              |              |             |
|---|--------------|--------------|-------------|
| 1 | 2.916407000  | 1.216233000  | 4.642232000 |
| 1 | -2.919786000 | -1.209753000 | 4.643957000 |
| 1 | 1.212098000  | 2.925398000  | 4.635931000 |
| 1 | -2.919366000 | 1.210566000  | 4.644331000 |
| 1 | -1.202406000 | 2.921638000  | 4.642257000 |

Zero-point correction= 0.569700 (Hartree/Particle)  
 Thermal correction to Energy= 0.600629  
 Thermal correction to Enthalpy= 0.601573  
 Thermal correction to Gibbs Free Energy= 0.517732  
 Sum of electronic and zero-point Energies= -2447.903085  
 Sum of electronic and thermal Energies= -2447.872156  
 Sum of electronic and thermal Enthalpies= -2447.871211  
**Sum of electronic and thermal Free Energies= -2447.955053**  
**Number of imaginary frequencies = 0**

### Optimized Geometries of TSs tubes with tube length 9.5 Å

#### (5,0)CNT<sub>TS</sub>

|   |              |              |              |
|---|--------------|--------------|--------------|
| 6 | 3.149435000  | -2.710327000 | 0.963031000  |
| 6 | 2.376187000  | -3.071465000 | -0.200796000 |
| 6 | 0.316136000  | -2.449612000 | 1.052545000  |
| 6 | 0.989710000  | -2.863450000 | -0.196207000 |
| 6 | -1.051132000 | -2.257823000 | 1.045254000  |
| 6 | -1.818705000 | -2.539424000 | -0.196639000 |
| 6 | -3.862249000 | -1.797331000 | 0.940815000  |
| 6 | -3.194457000 | -2.380863000 | -0.198113000 |
| 6 | 3.451795000  | -0.496982000 | 1.769145000  |
| 6 | 2.595109000  | -1.652376000 | 1.743687000  |
| 6 | 0.643219000  | -0.153784000 | 1.784503000  |
| 6 | 1.182088000  | -1.477667000 | 1.725991000  |
| 6 | -0.751703000 | 0.058520000  | 1.751366000  |
| 6 | -1.627834000 | -1.074755000 | 1.676920000  |
| 6 | -3.526638000 | 0.455854000  | 1.772330000  |
| 6 | -3.037062000 | -0.874547000 | 1.688712000  |
| 6 | 3.614276000  | 1.409980000  | 0.213181000  |
| 6 | 2.920846000  | 0.716459000  | 1.315398000  |
| 6 | 0.982890000  | 1.703962000  | 0.224809000  |
| 6 | 1.514519000  | 0.875019000  | 1.293423000  |
| 6 | -0.475198000 | 2.104194000  | 0.233715000  |
| 6 | -1.278048000 | 1.319306000  | 1.308868000  |
| 6 | -3.317792000 | 2.134057000  | 0.208114000  |
| 6 | -2.672886000 | 1.506774000  | 1.343909000  |
| 6 | 3.486859000  | -0.184778000 | -1.656244000 |
| 6 | 2.944685000  | 0.930594000  | -1.006738000 |
| 6 | 0.682548000  | 0.162641000  | -1.655803000 |
| 6 | 1.541673000  | 1.094282000  | -0.978854000 |
| 6 | -0.714728000 | 0.362514000  | -1.621951000 |
| 6 | -1.254413000 | 1.520175000  | -0.976122000 |
| 6 | -3.489399000 | 0.759166000  | -1.636329000 |



|   |              |              |              |
|---|--------------|--------------|--------------|
| 6 | -2.648764000 | 1.715020000  | -1.008169000 |
| 6 | 3.173305000  | -2.506989000 | -1.263928000 |
| 6 | 2.633162000  | -1.324164000 | -1.850508000 |
| 6 | 0.342414000  | -2.229010000 | -1.362841000 |
| 6 | 1.220701000  | -1.151005000 | -1.828500000 |
| 6 | -1.024654000 | -2.042484000 | -1.352183000 |
| 6 | -1.589271000 | -0.765060000 | -1.774597000 |
| 6 | -3.837443000 | -1.605296000 | -1.231944000 |
| 6 | -2.997885000 | -0.564833000 | -1.784406000 |
| 1 | 4.213826000  | -2.925301000 | 1.007484000  |
| 1 | 4.238743000  | -2.712693000 | -1.324567000 |
| 1 | 4.529948000  | -0.645033000 | 1.760396000  |
| 1 | 4.565066000  | -0.332611000 | -1.651124000 |
| 1 | 4.696113000  | 1.509182000  | 0.234928000  |
| 1 | -4.943802000 | -1.791457000 | 1.035923000  |
| 1 | -4.916391000 | -1.582650000 | -1.350722000 |
| 1 | -4.601190000 | 0.623706000  | 1.791765000  |
| 1 | -4.564025000 | 0.927600000  | -1.645983000 |
| 1 | -4.361796000 | 2.421466000  | 0.223060000  |
| 6 | 1.626372000  | 4.294768000  | -0.587100000 |
| 6 | 0.277106000  | 4.377113000  | -0.634517000 |
| 1 | 2.201213000  | 4.739508000  | -1.395699000 |
| 1 | -0.202016000 | 4.896593000  | -1.457069000 |
| 6 | 2.363449000  | 3.598540000  | 0.448032000  |
| 1 | 3.428904000  | 3.786472000  | 0.447854000  |
| 1 | 1.953718000  | 3.591767000  | 1.451456000  |
| 6 | -0.581924000 | 3.676830000  | 0.366886000  |
| 1 | -1.624907000 | 3.976830000  | 0.272376000  |
| 1 | -0.271196000 | 3.906169000  | 1.391056000  |

Zero-point correction= 0.436457 (Hartree/Particle)  
 Thermal correction to Energy= 0.459221  
 Thermal correction to Enthalpy= 0.460165  
 Thermal correction to Gibbs Free Energy= 0.390878  
 Sum of electronic and zero-point Energies= -1685.474591  
 Sum of electronic and thermal Energies= -1685.451827  
 Sum of electronic and thermal Enthalpies= -1685.450883  
**Sum of electronic and thermal Free Energies= -1685.520171**  
**Number of imaginary frequencies = 1 (-461.7724)**

**(6,0)CNT<sub>TS</sub>**

|   |              |              |             |
|---|--------------|--------------|-------------|
| 6 | -3.786937000 | -0.908707000 | 2.020346000 |
| 6 | -2.905236000 | 0.183029000  | 2.191542000 |
| 6 | -0.995441000 | -1.384619000 | 2.047709000 |
| 6 | -1.482756000 | -0.053475000 | 2.185561000 |
| 6 | 0.426473000  | -1.621973000 | 2.059548000 |
| 6 | 1.319846000  | -0.519476000 | 2.224735000 |
| 6 | 3.221321000  | -2.065078000 | 2.056591000 |
| 6 | 2.743052000  | -0.751939000 | 2.237318000 |
| 6 | -4.037404000 | -2.407598000 | 0.201298000 |

|   |              |              |              |
|---|--------------|--------------|--------------|
| 6 | -3.274915000 | -2.048039000 | 1.352633000  |
| 6 | -1.230238000 | -2.902316000 | 0.205993000  |
| 6 | -1.855808000 | -2.289560000 | 1.360633000  |
| 6 | 0.164761000  | -3.126827000 | 0.206945000  |
| 6 | 0.950178000  | -2.749141000 | 1.364978000  |
| 6 | 2.987154000  | -3.504037000 | 0.202632000  |
| 6 | 2.369523000  | -2.972686000 | 1.365815000  |
| 6 | -3.835250000 | -1.220182000 | -1.839438000 |
| 6 | -3.304083000 | -2.239053000 | -1.011705000 |
| 6 | -1.043507000 | -1.702289000 | -1.862049000 |
| 6 | -1.885481000 | -2.482821000 | -1.016607000 |
| 6 | 0.377627000  | -1.942967000 | -1.871580000 |
| 6 | 0.920840000  | -2.943282000 | -1.015920000 |
| 6 | 3.173750000  | -2.384417000 | -1.863934000 |
| 6 | 2.339800000  | -3.167890000 | -1.015823000 |
| 6 | -3.419716000 | 1.161048000  | -2.013507000 |
| 6 | -2.960024000 | -0.172346000 | -2.205900000 |
| 6 | -0.641769000 | 0.681556000  | -1.990602000 |
| 6 | -1.537039000 | -0.408824000 | -2.198013000 |
| 6 | 0.772028000  | 0.435985000  | -2.017074000 |
| 6 | 1.265296000  | -0.883910000 | -2.235015000 |
| 6 | 3.572076000  | -0.012265000 | -2.006890000 |
| 6 | 2.689628000  | -1.116181000 | -2.239815000 |
| 6 | -3.180479000 | 2.645295000  | -0.219745000 |
| 6 | -2.541572000 | 2.072163000  | -1.380825000 |
| 6 | -0.338323000 | 2.542903000  | -0.244687000 |
| 6 | -1.146604000 | 1.859258000  | -1.376849000 |
| 6 | 1.116917000  | 2.106934000  | -0.235086000 |
| 6 | 1.646124000  | 1.339111000  | -1.353977000 |
| 6 | 3.801699000  | 1.634526000  | -0.219997000 |
| 6 | 3.053418000  | 1.106054000  | -1.351700000 |
| 6 | -3.372973000 | 1.468115000  | 1.795953000  |
| 6 | -2.513130000 | 2.263140000  | 1.003003000  |
| 6 | -0.595879000 | 0.986743000  | 1.778528000  |
| 6 | -1.118296000 | 2.048962000  | 0.997314000  |
| 6 | 0.819628000  | 0.748715000  | 1.804514000  |
| 6 | 1.676272000  | 1.536682000  | 0.989656000  |
| 6 | 3.616987000  | 0.298551000  | 1.810802000  |
| 6 | 3.080584000  | 1.297045000  | 0.995960000  |
| 1 | -4.904985000 | -1.024335000 | -1.815767000 |
| 1 | -5.110741000 | -2.234717000 | 0.200553000  |
| 1 | -4.488909000 | 1.362184000  | -2.015840000 |
| 1 | -4.857392000 | -0.717085000 | 1.992602000  |
| 1 | -4.216913000 | 2.960478000  | -0.232979000 |
| 1 | -4.442555000 | 1.667283000  | 1.789615000  |
| 1 | 4.248283000  | -2.553010000 | -1.844608000 |
| 1 | 4.060817000  | -3.677392000 | 0.203551000  |
| 1 | 4.644408000  | -0.196028000 | -1.981519000 |
| 1 | 4.295529000  | -2.236082000 | 2.039564000  |
| 1 | 4.887070000  | 1.606312000  | -0.231046000 |

|   |              |             |              |
|---|--------------|-------------|--------------|
| 1 | 4.689172000  | 0.112932000 | 1.791558000  |
| 6 | 0.369304000  | 4.838182000 | 0.647784000  |
| 6 | 1.724225000  | 4.759163000 | 0.613147000  |
| 1 | -0.131925000 | 5.324761000 | 1.476891000  |
| 1 | 2.301061000  | 5.161681000 | 1.442206000  |
| 6 | -0.437510000 | 4.133927000 | -0.378558000 |
| 1 | -1.489963000 | 4.412957000 | -0.320148000 |
| 1 | -0.101333000 | 4.361924000 | -1.394197000 |
| 6 | 2.425341000  | 4.083054000 | -0.432715000 |
| 1 | 3.504264000  | 4.105031000 | -0.405434000 |
| 1 | 2.013191000  | 4.073625000 | -1.432566000 |

Zero-point correction= 0.509690 (Hartree/Particle)  
 Thermal correction to Energy= 0.536573  
 Thermal correction to Enthalpy= 0.537517  
 Thermal correction to Gibbs Free Energy= 0.460683  
 Sum of electronic and zero-point Energies= -1991.602257  
 Sum of electronic and thermal Energies= -1991.575374  
 Sum of electronic and thermal Enthalpies= -1991.574430  
**Sum of electronic and thermal Free Energies= -1991.651264**  
**Number of imaginary frequencies = 1 (-394.4235)**

**(7,0)CNT<sub>TS</sub>**

|   |              |              |              |
|---|--------------|--------------|--------------|
| 1 | 4.205828000  | -2.211056000 | -2.219097000 |
| 6 | 2.113914000  | -1.908998000 | -2.653848000 |
| 6 | 3.404752000  | -1.475792000 | -2.246626000 |
| 6 | 1.021461000  | -0.965539000 | -2.611520000 |
| 6 | 1.252663000  | 0.363653000  | -2.153503000 |
| 6 | -1.131392000 | 0.914237000  | -2.577679000 |
| 6 | 0.167370000  | 1.315363000  | -2.110060000 |
| 6 | -2.219406000 | 1.853804000  | -2.628354000 |
| 6 | -1.947949000 | 3.183883000  | -2.225787000 |
| 1 | -2.773683000 | 3.890756000  | -2.188075000 |
| 1 | 2.625356000  | -4.004381000 | -2.598316000 |
| 6 | 0.579480000  | -3.661175000 | -1.999852000 |
| 6 | 1.804621000  | -3.291044000 | -2.612326000 |
| 6 | -0.516193000 | -2.719301000 | -1.985439000 |
| 6 | -0.329179000 | -1.428941000 | -2.551428000 |
| 6 | -2.662919000 | -0.831659000 | -1.971214000 |
| 6 | -1.402869000 | -0.482034000 | -2.537542000 |
| 6 | -3.756797000 | 0.113140000  | -1.994887000 |
| 6 | -3.555163000 | 1.358373000  | -2.633140000 |
| 1 | -4.365427000 | 2.082842000  | -2.611645000 |
| 1 | 1.462062000  | -5.344590000 | -0.974651000 |
| 6 | -0.028618000 | -4.350140000 | 0.234031000  |
| 6 | 0.626242000  | -4.648957000 | -0.987939000 |
| 6 | -1.128810000 | -3.413251000 | 0.244209000  |
| 6 | -1.532849000 | -2.802803000 | -0.978531000 |
| 6 | -3.270198000 | -1.530251000 | 0.239905000  |
| 6 | -2.608161000 | -1.861897000 | -0.977299000 |

|   |              |              |              |
|---|--------------|--------------|--------------|
| 6 | -4.366264000 | -0.583814000 | 0.216730000  |
| 6 | -4.784353000 | -0.038042000 | -1.020057000 |
| 1 | -5.582988000 | 0.699404000  | -1.007341000 |
| 1 | 1.602252000  | -5.175175000 | 1.387922000  |
| 6 | 0.798232000  | -3.385934000 | 2.293196000  |
| 6 | 0.765844000  | -4.479767000 | 1.398369000  |
| 6 | -0.294780000 | -2.447560000 | 2.300950000  |
| 6 | -1.407874000 | -2.651578000 | 1.421706000  |
| 6 | -2.432648000 | -0.570599000 | 2.284225000  |
| 6 | -2.481127000 | -1.709629000 | 1.419509000  |
| 6 | -3.521511000 | 0.375220000  | 2.255350000  |
| 6 | -4.635212000 | 0.144682000  | 1.405882000  |
| 1 | -5.436697000 | 0.879182000  | 1.393409000  |
| 1 | 2.917259000  | -3.657603000 | 2.644723000  |
| 6 | 2.389153000  | -1.569190000 | 2.556248000  |
| 6 | 2.096971000  | -2.943122000 | 2.660907000  |
| 6 | 1.298050000  | -0.626701000 | 2.540595000  |
| 6 | -0.046359000 | -1.093123000 | 2.665606000  |
| 6 | -0.832962000 | 1.243239000  | 2.521745000  |
| 6 | -1.120141000 | -0.144645000 | 2.647226000  |
| 6 | -1.918447000 | 2.182339000  | 2.513112000  |
| 6 | -3.251483000 | 1.720121000  | 2.602448000  |
| 1 | -4.060950000 | 2.445762000  | 2.564878000  |
| 1 | 4.429012000  | -1.947994000 | 1.933022000  |
| 6 | 3.617581000  | -0.216669000 | 0.959789000  |
| 6 | 3.624250000  | -1.215519000 | 1.939029000  |
| 6 | 2.536765000  | 0.745340000  | 0.964802000  |
| 6 | 1.482838000  | 0.635004000  | 1.906498000  |
| 6 | 0.438016000  | 2.683576000  | 1.005022000  |
| 6 | 0.401765000  | 1.589796000  | 1.882585000  |
| 6 | -0.651130000 | 3.596929000  | 0.991928000  |
| 6 | -1.711835000 | 3.447755000  | 1.898233000  |
| 1 | -2.534115000 | 4.160444000  | 1.872537000  |
| 1 | 5.178127000  | -1.107566000 | -0.244532000 |
| 6 | 3.486406000  | -0.375277000 | -1.378269000 |
| 6 | 4.363678000  | -0.389400000 | -0.248115000 |
| 6 | 2.398454000  | 0.577950000  | -1.359320000 |
| 6 | 2.313508000  | 1.504039000  | -0.244066000 |
| 6 | 0.260051000  | 2.483298000  | -1.354874000 |
| 6 | 1.319609000  | 2.649397000  | -0.252624000 |
| 6 | -0.838433000 | 3.410741000  | -1.379690000 |
| 6 | -1.043382000 | 4.237842000  | -0.239356000 |
| 1 | -1.832428000 | 4.980893000  | -0.235993000 |
| 6 | 4.269024000  | 3.525893000  | 0.535101000  |
| 6 | 3.135015000  | 4.291065000  | 0.564564000  |
| 1 | 4.949239000  | 3.557275000  | 1.382865000  |
| 1 | 2.930641000  | 4.925498000  | 1.419821000  |
| 6 | 4.534174000  | 2.606115000  | -0.497928000 |
| 1 | 5.407838000  | 1.975726000  | -0.447314000 |
| 1 | 4.124598000  | 2.750211000  | -1.487074000 |

|   |             |             |              |
|---|-------------|-------------|--------------|
| 6 | 2.086729000 | 4.089108000 | -0.443819000 |
| 1 | 1.325749000 | 4.866204000 | -0.408950000 |
| 1 | 2.479294000 | 4.056854000 | -1.462617000 |

Zero-point correction= 0.580753 (Hartree/Particle)  
 Thermal correction to Energy= 0.612467  
 Thermal correction to Enthalpy= 0.613411  
 Thermal correction to Gibbs Free Energy= 0.527379  
 Sum of electronic and zero-point Energies= -2297.690447  
 Sum of electronic and thermal Energies= -2297.658733  
 Sum of electronic and thermal Enthalpies= -2297.657789  
**Sum of electronic and thermal Free Energies= -2297.743821**  
**Number of imaginary frequencies = 1 (-308.6605)**

**(8,0)CNT<sub>TS</sub>**

|   |              |              |              |
|---|--------------|--------------|--------------|
| 6 | 3.400540000  | 3.197091000  | -0.223902000 |
| 6 | 2.828693000  | 2.578229000  | -1.381091000 |
| 6 | 3.231172000  | 0.418744000  | -0.244699000 |
| 6 | 2.686547000  | 1.139154000  | -1.383667000 |
| 6 | 3.264698000  | -1.111390000 | -0.255078000 |
| 6 | 2.425701000  | -1.705219000 | -1.400511000 |
| 6 | 2.558742000  | -3.881711000 | -0.236619000 |
| 6 | 2.241926000  | -3.123507000 | -1.406594000 |
| 6 | 2.358131000  | 3.294601000  | 1.990182000  |
| 6 | 2.979585000  | 2.555800000  | 0.983063000  |
| 6 | 2.020816000  | 0.485723000  | 1.920793000  |
| 6 | 2.842173000  | 1.117911000  | 0.974526000  |
| 6 | 1.857156000  | -0.957668000 | 1.889684000  |
| 6 | 2.578843000  | -1.728149000 | 0.976189000  |
| 6 | 1.569374000  | -3.759719000 | 1.936758000  |
| 6 | 2.395590000  | -3.145328000 | 0.979126000  |
| 6 | 0.169943000  | 3.520569000  | 3.024712000  |
| 6 | 1.270885000  | 2.709728000  | 2.702999000  |
| 6 | -0.162862000 | 0.709782000  | 2.985505000  |
| 6 | 1.104224000  | 1.277289000  | 2.671326000  |
| 6 | -0.323241000 | -0.721240000 | 2.967165000  |
| 6 | 0.784250000  | -1.543728000 | 2.626614000  |
| 6 | -0.634961000 | -3.534571000 | 2.959921000  |
| 6 | 0.622032000  | -2.973481000 | 2.637453000  |
| 6 | -2.137225000 | 3.789136000  | 2.346234000  |
| 6 | -1.138031000 | 2.977854000  | 2.917860000  |
| 6 | -2.487869000 | 0.968153000  | 2.349709000  |
| 6 | -1.306387000 | 1.544348000  | 2.915516000  |
| 6 | -2.649697000 | -0.456497000 | 2.345522000  |
| 6 | -1.621129000 | -1.285786000 | 2.896608000  |
| 6 | -2.974094000 | -3.277696000 | 2.344470000  |
| 6 | -1.786120000 | -2.720950000 | 2.880367000  |
| 6 | -3.252199000 | 3.923895000  | 0.215778000  |
| 6 | -3.014296000 | 3.199116000  | 1.404132000  |

|   |              |              |              |
|---|--------------|--------------|--------------|
| 6 | -3.613950000 | 1.101883000  | 0.212415000  |
| 6 | -3.194220000 | 1.763713000  | 1.406073000  |
| 6 | -3.777427000 | -0.321607000 | 0.209359000  |
| 6 | -3.512493000 | -1.068212000 | 1.396693000  |
| 6 | -4.122513000 | -3.141771000 | 0.204890000  |
| 6 | -3.676664000 | -2.508823000 | 1.389032000  |
| 6 | -2.422180000 | 3.831046000  | -2.044171000 |
| 6 | -3.168409000 | 3.221826000  | -1.006538000 |
| 6 | -2.772462000 | 1.010405000  | -2.054848000 |
| 6 | -3.349400000 | 1.786722000  | -1.012164000 |
| 6 | -2.934218000 | -0.414515000 | -2.056796000 |
| 6 | -3.667087000 | -1.045391000 | -1.016080000 |
| 6 | -3.260740000 | -3.235315000 | -2.067889000 |
| 6 | -3.831653000 | -2.485856000 | -1.015256000 |
| 6 | -0.222606000 | 3.579080000  | -3.024455000 |
| 6 | -1.506442000 | 3.032716000  | -2.756702000 |
| 6 | -0.551558000 | 0.767039000  | -2.995291000 |
| 6 | -1.675038000 | 1.599178000  | -2.758896000 |
| 6 | -0.709107000 | -0.664243000 | -2.982333000 |
| 6 | -1.988110000 | -1.231802000 | -2.754314000 |
| 6 | -1.021759000 | -3.478270000 | -2.984829000 |
| 6 | -2.151158000 | -2.667111000 | -2.742988000 |
| 6 | 2.082763000  | 3.335593000  | -2.284857000 |
| 6 | 0.909871000  | 2.764289000  | -2.861998000 |
| 6 | 1.751105000  | 0.524322000  | -2.232190000 |
| 6 | 0.746028000  | 1.330585000  | -2.838309000 |
| 6 | 1.592972000  | -0.918399000 | -2.202299000 |
| 6 | 0.431698000  | -1.492355000 | -2.802402000 |
| 6 | 1.296411000  | -3.720040000 | -2.260837000 |
| 6 | 0.267589000  | -2.922062000 | -2.816992000 |
| 1 | -3.078346000 | -4.359903000 | 2.322910000  |
| 1 | -0.749565000 | -4.616005000 | 2.933689000  |
| 1 | -4.216985000 | -4.225013000 | 0.200703000  |
| 1 | 1.445260000  | -4.840737000 | 1.912089000  |
| 1 | -3.363792000 | -4.317783000 | -2.054648000 |
| 1 | 2.491823000  | -4.963423000 | -0.242541000 |
| 1 | -1.133531000 | -4.560083000 | -2.962409000 |
| 1 | 1.174923000  | -4.801403000 | -2.240399000 |
| 1 | -1.998590000 | 4.867841000  | 2.331730000  |
| 1 | 0.290188000  | 4.601820000  | 3.017972000  |
| 1 | -3.100046000 | 5.000756000  | 0.216248000  |
| 1 | 2.458303000  | 4.378318000  | 1.988834000  |
| 1 | -2.282106000 | 4.909517000  | -2.027457000 |
| 1 | 3.549921000  | 4.272298000  | -0.223889000 |
| 1 | -0.101710000 | 4.660187000  | -3.012701000 |
| 1 | 2.181744000  | 4.419295000  | -2.272899000 |
| 6 | 5.948007000  | 0.223874000  | 0.647067000  |
| 6 | 5.659098000  | -1.104011000 | 0.672391000  |
| 1 | 6.458907000  | 0.681256000  | 1.490538000  |
| 1 | 5.962060000  | -1.722519000 | 1.509680000  |

|   |             |              |              |
|---|-------------|--------------|--------------|
| 6 | 5.483909000 | 1.059881000  | -0.405666000 |
| 1 | 5.684195000 | 2.118779000  | -0.357029000 |
| 1 | 5.397436000 | 0.665357000  | -1.408453000 |
| 6 | 4.772438000 | -1.663107000 | -0.371752000 |
| 1 | 5.103602000 | -1.396034000 | -1.379700000 |
| 1 | 4.732684000 | -2.750968000 | -0.324971000 |

Zero-point correction= 0.655652 (Hartree/Particle)  
 Thermal correction to Energy= 0.690878  
 Thermal correction to Enthalpy= 0.691822  
 Thermal correction to Gibbs Free Energy= 0.599691  
 Sum of electronic and zero-point Energies= -2603.799409  
 Sum of electronic and thermal Energies= -2603.764183  
 Sum of electronic and thermal Enthalpies= -2603.763239  
**Sum of electronic and thermal Free Energies= -2603.855370**  
**Number of imaginary frequencies = 1 (-433.5613)**

### Optimized Geometries of [4+2] Adduct tubes with tube length 9.5 Å

#### (5,0) Adduct

|   |              |              |              |
|---|--------------|--------------|--------------|
| 6 | 3.528143000  | -2.290842000 | 0.956771000  |
| 6 | 2.804982000  | -2.761330000 | -0.201120000 |
| 6 | 0.687390000  | -2.373231000 | 1.043227000  |
| 6 | 1.413770000  | -2.739959000 | -0.199164000 |
| 6 | -0.687392000 | -2.373231000 | 1.043227000  |
| 6 | -1.413771000 | -2.739961000 | -0.199164000 |
| 6 | -3.528144000 | -2.290844000 | 0.956770000  |
| 6 | -2.804982000 | -2.761334000 | -0.201120000 |
| 6 | 3.520532000  | -0.038042000 | 1.793820000  |
| 6 | 2.833943000  | -1.279617000 | 1.704351000  |
| 6 | 0.706881000  | -0.015737000 | 1.696632000  |
| 6 | 1.408588000  | -1.263681000 | 1.657244000  |
| 6 | -0.706881000 | -0.015736000 | 1.696631000  |
| 6 | -1.408590000 | -1.263680000 | 1.657242000  |
| 6 | -3.520533000 | -0.038040000 | 1.793814000  |
| 6 | -2.833944000 | -1.279615000 | 1.704347000  |
| 6 | 3.584621000  | 1.636406000  | 0.204291000  |
| 6 | 2.846021000  | 1.121072000  | 1.341360000  |
| 6 | 0.797421000  | 2.096861000  | 0.246312000  |
| 6 | 1.431915000  | 1.153350000  | 1.287096000  |
| 6 | -0.797419000 | 2.096861000  | 0.246311000  |
| 6 | -1.431914000 | 1.153351000  | 1.287096000  |
| 6 | -3.584618000 | 1.636411000  | 0.204291000  |
| 6 | -2.846020000 | 1.121075000  | 1.341360000  |
| 6 | 3.520162000  | 0.273560000  | -1.664717000 |
| 6 | 2.846690000  | 1.328573000  | -1.006271000 |
| 6 | 0.707473000  | 0.280066000  | -1.562884000 |
| 6 | 1.432374000  | 1.352402000  | -0.945994000 |
| 6 | -0.707473000 | 0.280066000  | -1.562883000 |
| 6 | -1.432373000 | 1.352403000  | -0.945994000 |

|                                                     |              |              |                             |
|-----------------------------------------------------|--------------|--------------|-----------------------------|
| 6                                                   | -3.520162000 | 0.273561000  | -1.664712000                |
| 6                                                   | -2.846688000 | 1.328576000  | -1.006270000                |
| 6                                                   | 3.527565000  | -2.092501000 | -1.257584000                |
| 6                                                   | 2.833187000  | -0.962064000 | -1.809770000                |
| 6                                                   | 0.687207000  | -2.158328000 | -1.356662000                |
| 6                                                   | 1.408166000  | -0.954336000 | -1.759306000                |
| 6                                                   | -0.687208000 | -2.158328000 | -1.356662000                |
| 6                                                   | -1.408167000 | -0.954335000 | -1.759305000                |
| 6                                                   | -3.527566000 | -2.092501000 | -1.257581000                |
| 6                                                   | -2.833188000 | -0.962063000 | -1.809766000                |
| 1                                                   | 4.606564000  | -2.396734000 | 1.033459000                 |
| 1                                                   | 4.605979000  | -2.182669000 | -1.352507000                |
| 1                                                   | 4.607956000  | -0.034557000 | 1.829350000                 |
| 1                                                   | 4.607748000  | 0.281253000  | -1.693932000                |
| 1                                                   | 4.662065000  | 1.743654000  | 0.214249000                 |
| 1                                                   | -4.606564000 | -2.396738000 | 1.033459000                 |
| 1                                                   | -4.605981000 | -2.182670000 | -1.352506000                |
| 1                                                   | -4.607958000 | -0.034554000 | 1.829345000                 |
| 1                                                   | -4.607748000 | 0.281256000  | -1.693927000                |
| 1                                                   | -4.662062000 | 1.743663000  | 0.214250000                 |
| 6                                                   | 0.665374000  | 4.473357000  | -0.611620000                |
| 6                                                   | -0.665372000 | 4.473357000  | -0.611620000                |
| 1                                                   | 1.257921000  | 5.072688000  | -1.294092000                |
| 1                                                   | -1.257919000 | 5.072688000  | -1.294093000                |
| 6                                                   | 1.328234000  | 3.556705000  | 0.376120000                 |
| 1                                                   | 2.411407000  | 3.573777000  | 0.269247000                 |
| 1                                                   | 1.118385000  | 3.886443000  | 1.401426000                 |
| 6                                                   | -1.328233000 | 3.556705000  | 0.376120000                 |
| 1                                                   | -2.411406000 | 3.573777000  | 0.269246000                 |
| 1                                                   | -1.118385000 | 3.886443000  | 1.401426000                 |
| Zero-point correction=                              |              |              | 0.439977 (Hartree/Particle) |
| Thermal correction to Energy=                       |              |              | 0.462556                    |
| Thermal correction to Enthalpy=                     |              |              | 0.463500                    |
| Thermal correction to Gibbs Free Energy=            |              |              | 0.394636                    |
| Sum of electronic and zero-point Energies=          |              |              | -1685.542075                |
| Sum of electronic and thermal Energies=             |              |              | -1685.519496                |
| Sum of electronic and thermal Enthalpies=           |              |              | -1685.518552                |
| <b>Sum of electronic and thermal Free Energies=</b> |              |              | <b>-1685.587417</b>         |
| <b>Number of imaginary frequencies = 0</b>          |              |              |                             |

**(6,0) Adduct**

|   |              |              |             |
|---|--------------|--------------|-------------|
| 6 | -3.546774000 | -1.528701000 | 2.021051000 |
| 6 | -2.857615000 | -0.304801000 | 2.180881000 |
| 6 | -0.720638000 | -1.524482000 | 2.008475000 |
| 6 | -1.416241000 | -0.291260000 | 2.144269000 |
| 6 | 0.720638000  | -1.524482000 | 2.008475000 |
| 6 | 1.416241000  | -0.291260000 | 2.144269000 |
| 6 | 3.546774000  | -1.528702000 | 2.021052000 |
| 6 | 2.857615000  | -0.304801000 | 2.180881000 |
| 6 | -3.556258000 | -3.047899000 | 0.198004000 |



|   |              |              |              |
|---|--------------|--------------|--------------|
| 6 | -2.860728000 | -2.570225000 | 1.349538000  |
| 6 | -0.705581000 | -3.090333000 | 0.200536000  |
| 6 | -1.422256000 | -2.574660000 | 1.352845000  |
| 6 | 0.705581000  | -3.090333000 | 0.200536000  |
| 6 | 1.422256000  | -2.574660000 | 1.352845000  |
| 6 | 3.556258000  | -3.047899000 | 0.198004000  |
| 6 | 2.860728000  | -2.570225000 | 1.349538000  |
| 6 | -3.547630000 | -1.831365000 | -1.841152000 |
| 6 | -2.861428000 | -2.753107000 | -1.013266000 |
| 6 | -0.720593000 | -1.827182000 | -1.832031000 |
| 6 | -1.422355000 | -2.758629000 | -1.016432000 |
| 6 | 0.720593000  | -1.827182000 | -1.832031000 |
| 6 | 1.422355000  | -2.758629000 | -1.016432000 |
| 6 | 3.547630000  | -1.831365000 | -1.841152000 |
| 6 | 2.861428000  | -2.753107000 | -1.013266000 |
| 6 | -3.546520000 | 0.582355000  | -2.004219000 |
| 6 | -2.858427000 | -0.648082000 | -2.192567000 |
| 6 | -0.720020000 | 0.597307000  | -1.934578000 |
| 6 | -1.416506000 | -0.630233000 | -2.159726000 |
| 6 | 0.720020000  | 0.597307000  | -1.934578000 |
| 6 | 1.416506000  | -0.630233000 | -2.159725000 |
| 6 | 3.546520000  | 0.582355000  | -2.004219000 |
| 6 | 2.858427000  | -0.648082000 | -2.192566000 |
| 6 | -3.579181000 | 2.077656000  | -0.210972000 |
| 6 | -2.846405000 | 1.633827000  | -1.373812000 |
| 6 | -0.798680000 | 2.552100000  | -0.248883000 |
| 6 | -1.431642000 | 1.679448000  | -1.358461000 |
| 6 | 0.798680000  | 2.552100000  | -0.248883000 |
| 6 | 1.431642000  | 1.679448000  | -1.358461000 |
| 6 | 3.579181000  | 2.077656000  | -0.210973000 |
| 6 | 2.846405000  | 1.633828000  | -1.373813000 |
| 6 | -3.546110000 | 0.878865000  | 1.796167000  |
| 6 | -2.846752000 | 1.815317000  | 1.006193000  |
| 6 | -0.720360000 | 0.885264000  | 1.724309000  |
| 6 | -1.431622000 | 1.860373000  | 0.984164000  |
| 6 | 0.720360000  | 0.885264000  | 1.724309000  |
| 6 | 1.431622000  | 1.860373000  | 0.984164000  |
| 6 | 3.546110000  | 0.878865000  | 1.796167000  |
| 6 | 2.846752000  | 1.815317000  | 1.006192000  |
| 1 | -4.635248000 | -1.816338000 | -1.826148000 |
| 1 | -4.643536000 | -3.052157000 | 0.198477000  |
| 1 | -4.634524000 | 0.590518000  | -2.006216000 |
| 1 | -4.634382000 | -1.516261000 | 2.004364000  |
| 1 | -4.655242000 | 2.203559000  | -0.220935000 |
| 1 | -4.634189000 | 0.886256000  | 1.795076000  |
| 1 | 4.635248000  | -1.816338000 | -1.826148000 |
| 1 | 4.643536000  | -3.052157000 | 0.198477000  |
| 1 | 4.634524000  | 0.590519000  | -2.006217000 |
| 1 | 4.634382000  | -1.516261000 | 2.004364000  |
| 1 | 4.655242000  | 2.203559000  | -0.220935000 |

|   |              |             |              |
|---|--------------|-------------|--------------|
| 1 | 4.634189000  | 0.886256000 | 1.795076000  |
| 6 | -0.665770000 | 4.923967000 | 0.640595000  |
| 6 | 0.665770000  | 4.923967000 | 0.640595000  |
| 1 | -1.256497000 | 5.511876000 | 1.334686000  |
| 1 | 1.256497000  | 5.511875000 | 1.334686000  |
| 6 | -1.326293000 | 4.024151000 | -0.361012000 |
| 1 | -2.409771000 | 4.047491000 | -0.257967000 |
| 1 | -1.112053000 | 4.367034000 | -1.380832000 |
| 6 | 1.326293000  | 4.024151000 | -0.361012000 |
| 1 | 2.409772000  | 4.047490000 | -0.257967000 |
| 1 | 1.112053000  | 4.367034000 | -1.380832000 |

Zero-point correction= 0.512975 (Hartree/Particle)  
 Thermal correction to Energy= 0.539583  
 Thermal correction to Enthalpy= 0.540528  
 Thermal correction to Gibbs Free Energy= 0.464401  
 Sum of electronic and zero-point Energies= -1991.650438  
 Sum of electronic and thermal Energies= -1991.623830  
 Sum of electronic and thermal Enthalpies= -1991.622886  
**Sum of electronic and thermal Free Energies= -1991.699012**  
**Number of imaginary frequencies = 0**

#### (7,0) Adduct

|   |              |              |              |
|---|--------------|--------------|--------------|
| 1 | -4.629451000 | -1.142366000 | -2.187405000 |
| 6 | -2.861695000 | 0.017417000  | -2.600332000 |
| 6 | -3.541963000 | -1.158489000 | -2.211717000 |
| 6 | -1.425194000 | 0.018050000  | -2.520113000 |
| 6 | -0.720284000 | -1.136603000 | -2.042734000 |
| 6 | 1.424826000  | 0.035263000  | -2.520146000 |
| 6 | 0.733926000  | -1.127800000 | -2.042724000 |
| 6 | 2.861240000  | 0.051951000  | -2.600373000 |
| 6 | 3.555674000  | -1.115680000 | -2.211809000 |
| 1 | 4.642889000  | -1.086344000 | -2.187471000 |
| 1 | -4.637526000 | 1.250429000  | -2.586585000 |
| 6 | -2.890813000 | 2.356899000  | -1.985207000 |
| 6 | -3.550393000 | 1.266254000  | -2.590408000 |
| 6 | -1.444020000 | 2.363141000  | -1.962570000 |
| 6 | -0.724460000 | 1.254403000  | -2.478028000 |
| 6 | 1.415401000  | 2.380463000  | -1.962638000 |
| 6 | 0.709276000  | 1.263094000  | -2.478122000 |
| 6 | 2.862166000  | 2.391594000  | -1.985228000 |
| 6 | 3.534854000  | 1.308965000  | -2.590372000 |
| 1 | 4.622100000  | 1.306214000  | -2.586507000 |
| 1 | -4.664576000 | 3.105182000  | -1.004835000 |
| 6 | -2.899936000 | 3.317993000  | 0.213504000  |
| 6 | -3.578048000 | 3.139870000  | -1.015559000 |
| 6 | -1.448768000 | 3.333052000  | 0.226821000  |
| 6 | -0.733263000 | 3.138709000  | -0.988977000 |
| 6 | 1.408473000  | 3.350269000  | 0.226810000  |
| 6 | 0.695361000  | 3.147358000  | -0.989003000 |

|   |              |              |              |
|---|--------------|--------------|--------------|
| 6 | 2.859713000  | 3.352687000  | 0.213488000  |
| 6 | 3.539927000  | 3.182772000  | -1.015587000 |
| 1 | 4.626795000  | 3.161104000  | -1.004837000 |
| 1 | -4.664633000 | 2.902462000  | 1.390336000  |
| 6 | -2.880568000 | 2.031795000  | 2.243518000  |
| 6 | -3.577854000 | 2.933314000  | 1.399165000  |
| 6 | -1.436033000 | 2.040335000  | 2.250418000  |
| 6 | -0.731476000 | 2.957447000  | 1.403372000  |
| 6 | 1.411306000  | 2.057487000  | 2.250456000  |
| 6 | 0.695768000  | 2.966039000  | 1.403361000  |
| 6 | 2.855834000  | 2.066284000  | 2.243492000  |
| 6 | 3.542229000  | 2.976025000  | 1.399072000  |
| 1 | 4.629296000  | 2.958111000  | 1.390150000  |
| 1 | -4.636590000 | 0.822623000  | 2.597143000  |
| 6 | -2.848695000 | -0.384053000 | 2.487287000  |
| 6 | -3.549109000 | 0.839844000  | 2.608184000  |
| 6 | -1.412286000 | -0.379835000 | 2.444169000  |
| 6 | -0.722146000 | 0.856424000  | 2.576243000  |
| 6 | 1.416663000  | -0.362823000 | 2.444317000  |
| 6 | 0.711722000  | 0.865067000  | 2.576320000  |
| 6 | 2.853002000  | -0.349733000 | 2.487455000  |
| 6 | 3.538664000  | 0.882489000  | 2.608276000  |
| 1 | 4.626272000  | 0.878334000  | 2.597070000  |
| 1 | -4.623429000 | -1.467690000 | 1.887367000  |
| 6 | -2.857247000 | -2.292545000 | 0.984302000  |
| 6 | -3.535148000 | -1.479810000 | 1.901960000  |
| 6 | -1.425067000 | -2.336626000 | 0.980019000  |
| 6 | -0.717462000 | -1.454564000 | 1.802340000  |
| 6 | 1.453111000  | -2.319232000 | 0.980022000  |
| 6 | 0.734889000  | -1.445848000 | 1.802395000  |
| 6 | 2.884686000  | -2.257833000 | 0.984320000  |
| 6 | 3.552667000  | -1.437083000 | 1.902131000  |
| 1 | 4.640724000  | -1.411799000 | 1.887555000  |
| 1 | -4.663795000 | -2.555463000 | -0.226593000 |
| 6 | -2.872664000 | -2.075648000 | -1.374844000 |
| 6 | -3.579907000 | -2.561229000 | -0.233951000 |
| 6 | -1.430245000 | -2.110628000 | -1.348315000 |
| 6 | -0.782491000 | -2.993926000 | -0.261395000 |
| 6 | 1.455633000  | -2.093129000 | -1.348298000 |
| 6 | 0.818578000  | -2.984216000 | -0.261389000 |
| 6 | 2.897520000  | -2.040759000 | -1.374823000 |
| 6 | 3.610554000  | -2.517678000 | -0.233916000 |
| 1 | 4.694285000  | -2.498554000 | -0.226516000 |
| 6 | -0.632991000 | -5.379360000 | 0.592062000  |
| 6 | 0.698070000  | -5.371246000 | 0.592097000  |
| 1 | -1.224540000 | -5.973964000 | 1.279994000  |
| 1 | 1.296779000  | -5.958590000 | 1.280070000  |
| 6 | -1.295191000 | -4.473927000 | -0.402089000 |
| 1 | -2.378658000 | -4.498211000 | -0.307779000 |
| 1 | -1.072419000 | -4.801521000 | -1.425424000 |

|   |             |              |              |
|---|-------------|--------------|--------------|
| 6 | 1.349236000 | -4.457894000 | -0.402114000 |
| 1 | 2.432937000 | -4.469137000 | -0.307912000 |
| 1 | 1.130221000 | -4.788144000 | -1.425393000 |

Zero-point correction= 0.584518 (Hartree/Particle)  
 Thermal correction to Energy= 0.615764  
 Thermal correction to Enthalpy= 0.616708  
 Thermal correction to Gibbs Free Energy= 0.531972  
 Sum of electronic and zero-point Energies= -2297.736503  
 Sum of electronic and thermal Energies= -2297.705258  
 Sum of electronic and thermal Enthalpies= -2297.704314  
**Sum of electronic and thermal Free Energies= -2297.789050**  
**Number of imaginary frequencies = 0**

**(8,0) Adduct**

|   |              |              |              |
|---|--------------|--------------|--------------|
| 6 | 2.997056000  | -3.591516000 | 0.214808000  |
| 6 | 2.612280000  | -2.865834000 | 1.387157000  |
| 6 | 3.499977000  | -0.799399000 | 0.246670000  |
| 6 | 2.664103000  | -1.433955000 | 1.374187000  |
| 6 | 3.499972000  | 0.799533000  | 0.246671000  |
| 6 | 2.664067000  | 1.434073000  | 1.374193000  |
| 6 | 2.996889000  | 3.591655000  | 0.214802000  |
| 6 | 2.612164000  | 2.865950000  | 1.387154000  |
| 6 | 1.967384000  | -3.549479000 | -1.935984000 |
| 6 | 2.750604000  | -2.865080000 | -0.994215000 |
| 6 | 1.955820000  | -0.728358000 | -1.832057000 |
| 6 | 2.803510000  | -1.433499000 | -0.975901000 |
| 6 | 1.955798000  | 0.728449000  | -1.832060000 |
| 6 | 2.803479000  | 1.433621000  | -0.975911000 |
| 6 | 1.967236000  | 3.549567000  | -1.935986000 |
| 6 | 2.750488000  | 2.865199000  | -0.994221000 |
| 6 | -0.258988000 | -3.547539000 | -2.928265000 |
| 6 | 0.928279000  | -2.855654000 | -2.602824000 |
| 6 | -0.260889000 | -0.719453000 | -2.882488000 |
| 6 | 0.932285000  | -1.416182000 | -2.554063000 |
| 6 | -0.260918000 | 0.719452000  | -2.882485000 |
| 6 | 0.932229000  | 1.416230000  | -2.554057000 |
| 6 | -0.259135000 | 3.547537000  | -2.928265000 |
| 6 | 0.928160000  | 2.855703000  | -2.602824000 |
| 6 | -2.613863000 | -3.558763000 | -2.322504000 |
| 6 | -1.494442000 | -2.868033000 | -2.845410000 |
| 6 | -2.614436000 | -0.716957000 | -2.312977000 |
| 6 | -1.489356000 | -1.423601000 | -2.844439000 |
| 6 | -2.614466000 | 0.716858000  | -2.312977000 |
| 6 | -1.489414000 | 1.423549000  | -2.844436000 |
| 6 | -2.614013000 | 3.558663000  | -2.322510000 |
| 6 | -1.494561000 | 2.867980000  | -2.845411000 |
| 6 | -3.772931000 | -3.561218000 | -0.193214000 |
| 6 | -3.413763000 | -2.875783000 | -1.377450000 |

|   |              |              |              |
|---|--------------|--------------|--------------|
| 6 | -3.767773000 | -0.716926000 | -0.192950000 |
| 6 | -3.419691000 | -1.426675000 | -1.381701000 |
| 6 | -3.767804000 | 0.716781000  | -0.192951000 |
| 6 | -3.419750000 | 1.426543000  | -1.381702000 |
| 6 | -3.773083000 | 3.561073000  | -0.193219000 |
| 6 | -3.413885000 | 2.875652000  | -1.377454000 |
| 6 | -2.876989000 | -3.558692000 | 2.060178000  |
| 6 | -3.556274000 | -2.875788000 | 1.025279000  |
| 6 | -2.875555000 | -0.716936000 | 2.050096000  |
| 6 | -3.562612000 | -1.426645000 | 1.028393000  |
| 6 | -2.875585000 | 0.716832000  | 2.050095000  |
| 6 | -3.562671000 | 1.426511000  | 1.028391000  |
| 6 | -2.877137000 | 3.558587000  | 2.060173000  |
| 6 | -3.556394000 | 2.875654000  | 1.025275000  |
| 6 | -0.611228000 | -3.547976000 | 2.943836000  |
| 6 | -1.827519000 | -2.868366000 | 2.713069000  |
| 6 | -0.607525000 | -0.719429000 | 2.898511000  |
| 6 | -1.822443000 | -1.423711000 | 2.712696000  |
| 6 | -0.607553000 | 0.719420000  | 2.898507000  |
| 6 | -1.822500000 | 1.423652000  | 2.712690000  |
| 6 | -0.611373000 | 3.547966000  | 2.943828000  |
| 6 | -1.827636000 | 2.868306000  | 2.713062000  |
| 6 | 1.719372000  | -3.549900000 | 2.227682000  |
| 6 | 0.606914000  | -2.856224000 | 2.762529000  |
| 6 | 1.719439000  | -0.728457000 | 2.123932000  |
| 6 | 0.616552000  | -1.416531000 | 2.715948000  |
| 6 | 1.719416000  | 0.728542000  | 2.123932000  |
| 6 | 0.616497000  | 1.416571000  | 2.715940000  |
| 6 | 1.719227000  | 3.549982000  | 2.227678000  |
| 6 | 0.606798000  | 2.856264000  | 2.762523000  |
| 1 | -2.598198000 | 4.645936000  | -2.308369000 |
| 1 | -0.252200000 | 4.635319000  | -2.921159000 |
| 1 | -3.742871000 | 4.648041000  | -0.191519000 |
| 1 | 1.954711000  | 4.637917000  | -1.923710000 |
| 1 | -2.860843000 | 4.645895000  | 2.048890000  |
| 1 | 3.040829000  | 4.674590000  | 0.217230000  |
| 1 | -0.603603000 | 4.635725000  | 2.936716000  |
| 1 | 1.707920000  | 4.638290000  | 2.213940000  |
| 1 | -2.598003000 | -4.646034000 | -2.308362000 |
| 1 | -0.252009000 | -4.635321000 | -2.921160000 |
| 1 | -3.742673000 | -4.648184000 | -0.191512000 |
| 1 | 1.954904000  | -4.637829000 | -1.923711000 |
| 1 | -2.860649000 | -4.645999000 | 2.048897000  |
| 1 | 3.041042000  | -4.674448000 | 0.217237000  |
| 1 | -0.603413000 | -4.635735000 | 2.936727000  |
| 1 | 1.708110000  | -4.638209000 | 2.213950000  |
| 6 | 5.857937000  | -0.665843000 | -0.686565000 |
| 6 | 5.857954000  | 0.665922000  | -0.686557000 |
| 1 | 6.432816000  | -1.257217000 | -1.391117000 |
| 1 | 6.432852000  | 1.257288000  | -1.391099000 |

|   |             |              |             |
|---|-------------|--------------|-------------|
| 6 | 4.979307000 | -1.323941000 | 0.334224000 |
| 1 | 5.000554000 | -2.407515000 | 0.235253000 |
| 1 | 5.340932000 | -1.104570000 | 1.346882000 |
| 6 | 4.979331000 | 1.324031000  | 0.334233000 |
| 1 | 5.340956000 | 1.104640000  | 1.346887000 |
| 1 | 5.000629000 | 2.407602000  | 0.235277000 |

Zero-point correction= 0.658985 (Hartree/Particle)  
 Thermal correction to Energy= 0.693916  
 Thermal correction to Enthalpy= 0.694860  
 Thermal correction to Gibbs Free Energy= 0.603526  
 Sum of electronic and zero-point Energies= -2603.840755  
 Sum of electronic and thermal Energies= -2603.805824  
 Sum of electronic and thermal Enthalpies= -2603.804880  
**Sum of electronic and thermal Free Energies= -2603.896214**  
**Number of imaginary frequencies = 0**

### Optimized Geometries of [5+4] adducts with tube length 9.5 Å

#### (5,0) Adduct

|   |              |              |              |
|---|--------------|--------------|--------------|
| 6 | -2.829255000 | -2.939482000 | -0.958852000 |
| 6 | -2.006109000 | -3.277216000 | 0.192372000  |
| 6 | -0.051112000 | -2.419185000 | -1.060510000 |
| 6 | -0.666301000 | -2.932187000 | 0.188971000  |
| 6 | 1.293335000  | -2.100709000 | -1.053155000 |
| 6 | 2.079202000  | -2.307287000 | 0.189434000  |
| 6 | 4.059390000  | -1.399869000 | -0.943834000 |
| 6 | 3.440150000  | -2.029472000 | 0.192836000  |
| 6 | -3.368209000 | -0.735753000 | -1.701975000 |
| 6 | -2.393493000 | -1.816757000 | -1.712716000 |
| 6 | -0.561747000 | -0.170816000 | -1.874381000 |
| 6 | -1.002299000 | -1.535328000 | -1.749607000 |
| 6 | 0.808356000  | 0.163627000  | -1.826596000 |
| 6 | 1.774226000  | -0.886418000 | -1.707519000 |
| 6 | 3.536190000  | 0.809151000  | -1.777308000 |
| 6 | 3.162447000  | -0.559884000 | -1.707048000 |
| 6 | -3.625024000 | 1.379832000  | -0.228480000 |
| 6 | -2.927465000 | 0.506025000  | -1.298012000 |
| 6 | -0.968257000 | 1.413860000  | -0.197730000 |
| 6 | -1.523038000 | 0.750592000  | -1.313232000 |
| 6 | 0.347854000  | 2.078817000  | -0.217804000 |
| 6 | 1.226022000  | 1.459291000  | -1.332143000 |
| 6 | 3.160112000  | 2.470475000  | -0.196656000 |
| 6 | 2.589822000  | 1.777026000  | -1.339187000 |
| 6 | -3.426715000 | -0.448330000 | 1.581761000  |
| 6 | -2.966281000 | 0.712773000  | 0.993513000  |
| 6 | -0.633266000 | 0.135947000  | 1.740958000  |
| 6 | -1.564831000 | 0.944741000  | 0.998558000  |
| 6 | 0.740735000  | 0.460997000  | 1.697953000  |
| 6 | 1.179180000  | 1.655257000  | 1.015017000  |

|   |              |              |              |
|---|--------------|--------------|--------------|
| 6 | 3.467992000  | 1.099337000  | 1.656825000  |
| 6 | 2.543864000  | 1.975764000  | 1.022390000  |
| 6 | -2.874683000 | -2.748584000 | 1.232689000  |
| 6 | -2.463275000 | -1.513791000 | 1.804834000  |
| 6 | -0.098567000 | -2.214615000 | 1.356900000  |
| 6 | -1.073658000 | -1.229085000 | 1.844942000  |
| 6 | 1.246011000  | -1.898088000 | 1.348984000  |
| 6 | 1.705709000  | -0.589745000 | 1.806103000  |
| 6 | 4.017333000  | -1.216442000 | 1.231504000  |
| 6 | 3.093736000  | -0.262603000 | 1.805089000  |
| 1 | -3.864918000 | -3.265046000 | -1.011843000 |
| 1 | -3.912698000 | -3.064142000 | 1.298593000  |
| 1 | -4.424993000 | -0.988709000 | -1.644672000 |
| 1 | -4.483288000 | -0.704214000 | 1.533912000  |
| 1 | -4.702326000 | 1.206026000  | -0.231233000 |
| 1 | 5.136554000  | -1.291030000 | -1.025511000 |
| 1 | 5.090885000  | -1.092081000 | 1.335567000  |
| 1 | 4.592102000  | 1.069846000  | -1.788801000 |
| 1 | 4.523793000  | 1.360714000  | 1.661560000  |
| 1 | 4.178874000  | 2.837197000  | -0.207508000 |
| 6 | -2.479395000 | 3.693429000  | 0.593876000  |
| 6 | -1.169733000 | 4.008961000  | 0.600707000  |
| 1 | -3.047922000 | 4.053325000  | 1.449258000  |
| 1 | -0.831954000 | 4.581018000  | 1.460860000  |
| 6 | -3.322625000 | 2.937545000  | -0.428324000 |
| 1 | -4.295099000 | 3.437519000  | -0.459648000 |
| 1 | -2.887361000 | 3.060983000  | -1.421426000 |
| 6 | -0.061039000 | 3.604578000  | -0.361522000 |
| 1 | 0.817984000  | 4.232407000  | -0.206948000 |
| 1 | -0.381356000 | 3.727908000  | -1.399903000 |

Zero-point correction= 0.440610 (Hartree/Particle)  
 Thermal correction to Energy= 0.463154  
 Thermal correction to Enthalpy= 0.464098  
 Thermal correction to Gibbs Free Energy= 0.395393  
 Sum of electronic and zero-point Energies= -1685.539184  
 Sum of electronic and thermal Energies= -1685.516640  
 Sum of electronic and thermal Enthalpies= -1685.515696  
**Sum of electronic and thermal Free Energies= -1685.584400**  
**Number of imaginary frequencies = 0**

**(6,0) Adduct**

|   |              |              |              |
|---|--------------|--------------|--------------|
| 6 | 2.844376000  | -2.467220000 | -2.060492000 |
| 6 | 2.567929000  | -1.105557000 | -2.223398000 |
| 6 | 0.135262000  | -1.630770000 | -2.095740000 |
| 6 | 1.189634000  | -0.672486000 | -2.274265000 |
| 6 | -1.234906000 | -1.188356000 | -2.080354000 |
| 6 | -1.534698000 | 0.201363000  | -2.227562000 |
| 6 | -3.938846000 | -0.305060000 | -2.030678000 |
| 6 | -2.909747000 | 0.645749000  | -2.213659000 |

|   |              |              |              |
|---|--------------|--------------|--------------|
| 6 | 2.375463000  | -3.876319000 | -0.197678000 |
| 6 | 1.866848000  | -3.236333000 | -1.355413000 |
| 6 | -0.326400000 | -3.030263000 | -0.198929000 |
| 6 | 0.497442000  | -2.796505000 | -1.360786000 |
| 6 | -1.679224000 | -2.602182000 | -0.198655000 |
| 6 | -2.215558000 | -1.939336000 | -1.361009000 |
| 6 | -4.389219000 | -1.738835000 | -0.198531000 |
| 6 | -3.587017000 | -1.496753000 | -1.350448000 |
| 6 | 2.746820000  | -2.775425000 | 1.880913000  |
| 6 | 1.806836000  | -3.423827000 | 1.017750000  |
| 6 | 0.037139000  | -1.941739000 | 1.911664000  |
| 6 | 0.438170000  | -2.983185000 | 1.024578000  |
| 6 | -1.332995000 | -1.500128000 | 1.899549000  |
| 6 | -2.275434000 | -2.130504000 | 1.026247000  |
| 6 | -4.036326000 | -0.614446000 | 1.853781000  |
| 6 | -3.646427000 | -1.689059000 | 1.017848000  |
| 6 | 3.495034000  | -0.471801000 | 1.931285000  |
| 6 | 2.460401000  | -1.452139000 | 2.227033000  |
| 6 | 0.759748000  | 0.353400000  | 2.095598000  |
| 6 | 1.078480000  | -1.023091000 | 2.280638000  |
| 6 | -0.604246000 | 0.801372000  | 2.040968000  |
| 6 | -1.645926000 | -0.147613000 | 2.237054000  |
| 6 | -3.282245000 | 1.681266000  | 2.010515000  |
| 6 | -3.020495000 | 0.297729000  | 2.220663000  |
| 6 | 3.887435000  | 1.465038000  | 0.237938000  |
| 6 | 3.118686000  | 0.699368000  | 1.332038000  |
| 6 | 1.222056000  | 1.703683000  | 0.207572000  |
| 6 | 1.739623000  | 1.086292000  | 1.359692000  |
| 6 | -0.025047000 | 2.494833000  | 0.228885000  |
| 6 | -0.936156000 | 2.026549000  | 1.381594000  |
| 6 | -2.814132000 | 3.105772000  | 0.199852000  |
| 6 | -2.277308000 | 2.445865000  | 1.367042000  |
| 6 | 3.581841000  | -0.177087000 | -1.747669000 |
| 6 | 3.173109000  | 0.889087000  | -0.990789000 |
| 6 | 0.856447000  | 0.659331000  | -1.888254000 |
| 6 | 1.793627000  | 1.261065000  | -1.000596000 |
| 6 | -0.506652000 | 1.105036000  | -1.846185000 |
| 6 | -0.866326000 | 2.230448000  | -1.038889000 |
| 6 | -3.180706000 | 1.988196000  | -1.822125000 |
| 6 | -2.206834000 | 2.647720000  | -1.028600000 |
| 1 | 3.788856000  | -3.081513000 | 1.819715000  |
| 1 | 3.421558000  | -4.173951000 | -0.194892000 |
| 1 | 4.527478000  | -0.811604000 | 1.871438000  |
| 1 | 3.883777000  | -2.781810000 | -1.997220000 |
| 1 | 4.942236000  | 1.183852000  | 0.240450000  |
| 1 | 4.615533000  | -0.515776000 | -1.704652000 |
| 1 | -5.067085000 | -0.268434000 | 1.824462000  |
| 1 | -5.425982000 | -1.411500000 | -0.198417000 |
| 1 | -4.311027000 | 2.034984000  | 2.006314000  |
| 1 | -4.970568000 | 0.037726000  | -1.997321000 |



|   |              |             |              |
|---|--------------|-------------|--------------|
| 1 | -3.794410000 | 3.566842000 | 0.210863000  |
| 1 | -4.208235000 | 2.345408000 | -1.818049000 |
| 6 | 2.961010000  | 3.877188000 | -0.582374000 |
| 6 | 1.680686000  | 4.295936000 | -0.574868000 |
| 1 | 3.549924000  | 4.196777000 | -1.440096000 |
| 1 | 1.378850000  | 4.898101000 | -1.427876000 |
| 6 | 3.747178000  | 3.050095000 | 0.428839000  |
| 1 | 4.765175000  | 3.450149000 | 0.437382000  |
| 1 | 3.343390000  | 3.221046000 | 1.428549000  |
| 6 | 0.562291000  | 3.970374000 | 0.398492000  |
| 1 | -0.257597000 | 4.684736000 | 0.286219000  |
| 1 | 0.913908000  | 4.024547000 | 1.432625000  |

Zero-point correction= 0.515248 (Hartree/Particle)  
 Thermal correction to Energy= 0.541633  
 Thermal correction to Enthalpy= 0.542577  
 Thermal correction to Gibbs Free Energy= 0.466967  
 Sum of electronic and zero-point Energies= -1991.676675  
 Sum of electronic and thermal Energies= -1991.650291  
 Sum of electronic and thermal Enthalpies= -1991.649347  
**Sum of electronic and thermal Free Energies= -1991.724956**  
**Number of imaginary frequencies = 0**

#### (7,0) Adduct

|   |              |              |              |
|---|--------------|--------------|--------------|
| 1 | 4.342908000  | 1.883393000  | 2.023791000  |
| 6 | 2.209858000  | 1.711138000  | 2.538479000  |
| 6 | 3.492108000  | 1.204684000  | 2.046041000  |
| 6 | 1.071661000  | 0.811818000  | 2.598369000  |
| 6 | 1.228393000  | -0.551843000 | 2.240334000  |
| 6 | -1.155226000 | -0.969794000 | 2.593607000  |
| 6 | 0.126006000  | -1.451529000 | 2.196556000  |
| 6 | -2.289309000 | -1.860985000 | 2.563992000  |
| 6 | -2.070182000 | -3.204612000 | 2.149329000  |
| 1 | -2.909674000 | -3.896842000 | 2.138173000  |
| 1 | 2.843422000  | 3.749945000  | 2.449280000  |
| 6 | 0.722524000  | 3.554680000  | 2.018031000  |
| 6 | 1.989698000  | 3.078431000  | 2.510160000  |
| 6 | -0.402532000 | 2.654742000  | 2.022307000  |
| 6 | -0.260359000 | 1.342398000  | 2.568012000  |
| 6 | -2.625933000 | 0.866371000  | 2.009573000  |
| 6 | -1.372032000 | 0.439962000  | 2.554627000  |
| 6 | -3.764836000 | -0.023942000 | 1.986488000  |
| 6 | -3.596543000 | -1.336641000 | 2.497473000  |
| 1 | -4.435583000 | -2.027105000 | 2.451698000  |
| 1 | 1.636221000  | 5.244858000  | 1.060584000  |
| 6 | 0.075096000  | 4.358713000  | -0.157881000 |
| 6 | 0.770428000  | 4.586855000  | 1.074541000  |
| 6 | -1.038422000 | 3.456473000  | -0.163494000 |
| 6 | -1.443434000 | 2.818733000  | 1.056600000  |
| 6 | -3.250536000 | 1.653454000  | -0.172117000 |

|   |              |              |              |
|---|--------------|--------------|--------------|
| 6 | -2.551545000 | 1.921244000  | 1.052846000  |
| 6 | -4.389420000 | 0.769060000  | -0.188688000 |
| 6 | -4.802149000 | 0.192110000  | 1.046339000  |
| 1 | -5.633379000 | -0.508434000 | 1.031040000  |
| 1 | 1.729561000  | 5.141043000  | -1.296363000 |
| 6 | 0.885856000  | 3.368614000  | -2.200737000 |
| 6 | 0.862276000  | 4.485306000  | -1.322101000 |
| 6 | -0.237395000 | 2.476334000  | -2.219402000 |
| 6 | -1.345609000 | 2.714623000  | -1.346032000 |
| 6 | -2.466610000 | 0.679875000  | -2.214769000 |
| 6 | -2.457736000 | 1.817110000  | -1.347362000 |
| 6 | -3.608941000 | -0.205196000 | -2.230318000 |
| 6 | -4.719082000 | 0.105213000  | -1.395186000 |
| 1 | -5.550826000 | -0.594613000 | -1.380545000 |
| 1 | 3.025492000  | 3.538859000  | -2.466962000 |
| 6 | 2.396055000  | 1.484761000  | -2.447095000 |
| 6 | 2.173431000  | 2.866044000  | -2.536171000 |
| 6 | 1.266331000  | 0.594129000  | -2.502850000 |
| 6 | -0.054727000 | 1.114023000  | -2.618320000 |
| 6 | -0.979987000 | -1.192155000 | -2.484280000 |
| 6 | -1.175723000 | 0.212761000  | -2.611245000 |
| 6 | -2.113964000 | -2.080342000 | -2.507312000 |
| 6 | -3.417194000 | -1.537714000 | -2.665220000 |
| 1 | -4.264637000 | -2.218237000 | -2.638380000 |
| 1 | 4.482377000  | 1.699790000  | -1.805715000 |
| 6 | 3.584239000  | -0.069002000 | -1.011000000 |
| 6 | 3.627836000  | 1.025997000  | -1.829603000 |
| 6 | 2.417191000  | -0.890398000 | -1.012747000 |
| 6 | 1.381207000  | -0.727223000 | -1.949146000 |
| 6 | 0.237525000  | -2.713115000 | -1.008198000 |
| 6 | 0.254446000  | -1.616770000 | -1.892258000 |
| 6 | -0.902333000 | -3.567488000 | -1.000655000 |
| 6 | -1.955218000 | -3.362909000 | -1.922792000 |
| 1 | -2.815612000 | -4.027714000 | -1.884570000 |
| 1 | 5.350398000  | 0.279888000  | 0.204511000  |
| 6 | 3.499177000  | 0.053491000  | 1.323593000  |
| 6 | 4.464991000  | -0.358704000 | 0.205104000  |
| 6 | 2.334760000  | -0.797928000 | 1.348880000  |
| 6 | 2.039205000  | -1.520926000 | 0.210296000  |
| 6 | 0.207344000  | -2.660761000 | 1.432038000  |
| 6 | 1.167683000  | -2.718522000 | 0.224525000  |
| 6 | -0.907823000 | -3.510150000 | 1.404608000  |
| 6 | -1.257441000 | -4.243926000 | 0.207939000  |
| 1 | -2.057687000 | -4.974144000 | 0.221049000  |
| 6 | 4.429293000  | -2.900898000 | -0.692949000 |
| 6 | 3.377690000  | -3.743504000 | -0.700029000 |
| 1 | 5.062765000  | -2.940013000 | -1.577302000 |
| 1 | 3.282842000  | -4.362871000 | -1.588590000 |
| 6 | 4.900032000  | -1.896481000 | 0.350863000  |
| 1 | 5.993593000  | -1.910682000 | 0.338014000  |

|   |             |              |             |
|---|-------------|--------------|-------------|
| 1 | 4.598346000 | -2.231141000 | 1.344952000 |
| 6 | 2.245354000 | -3.893787000 | 0.300565000 |
| 1 | 1.741525000 | -4.852471000 | 0.156645000 |
| 1 | 2.625211000 | -3.864930000 | 1.325730000 |

Zero-point correction= 0.586343 (Hartree/Particle)  
 Thermal correction to Energy= 0.617330  
 Thermal correction to Enthalpy= 0.618274  
 Thermal correction to Gibbs Free Energy= 0.534113  
 Sum of electronic and zero-point Energies= -2297.757113  
 Sum of electronic and thermal Energies= -2297.726126  
 Sum of electronic and thermal Enthalpies= -2297.725182  
**Sum of electronic and thermal Free Energies= -2297.809343**  
**Number of imaginary frequencies = 0**

**(8,0) Adduct**

|   |              |              |              |
|---|--------------|--------------|--------------|
| 6 | 4.425730000  | 1.890302000  | -0.233876000 |
| 6 | 3.405946000  | 1.723112000  | -1.365102000 |
| 6 | 2.947880000  | -0.364560000 | -0.207480000 |
| 6 | 2.853807000  | 0.397021000  | -1.378385000 |
| 6 | 2.833600000  | -1.841259000 | -0.220391000 |
| 6 | 1.950985000  | -2.296235000 | -1.389037000 |
| 6 | 1.580454000  | -4.427458000 | -0.189099000 |
| 6 | 1.444864000  | -3.626344000 | -1.369872000 |
| 6 | 3.068562000  | 2.606998000  | 1.866678000  |
| 6 | 3.537626000  | 1.675690000  | 0.988404000  |
| 6 | 2.057912000  | -0.055310000 | 1.986874000  |
| 6 | 2.969432000  | 0.359967000  | 0.993270000  |
| 6 | 1.573289000  | -1.417366000 | 1.956318000  |
| 6 | 2.104061000  | -2.342092000 | 1.036247000  |
| 6 | 0.636375000  | -4.065541000 | 1.983190000  |
| 6 | 1.596265000  | -3.669798000 | 1.029108000  |
| 6 | 0.972342000  | 3.373553000  | 2.905046000  |
| 6 | 1.841886000  | 2.333521000  | 2.599391000  |
| 6 | -0.013749000 | 0.711475000  | 2.990205000  |
| 6 | 1.353076000  | 0.969580000  | 2.659144000  |
| 6 | -0.497800000 | -0.647983000 | 2.992741000  |
| 6 | 0.385542000  | -1.721667000 | 2.677412000  |
| 6 | -1.461376000 | -3.325346000 | 2.988176000  |
| 6 | -0.105921000 | -3.076367000 | 2.678212000  |
| 6 | -1.251105000 | 4.157174000  | 2.306426000  |
| 6 | -0.437962000 | 3.148094000  | 2.843434000  |
| 6 | -2.214610000 | 1.487629000  | 2.323122000  |
| 6 | -0.927506000 | 1.787282000  | 2.871407000  |
| 6 | -2.693481000 | 0.135933000  | 2.327785000  |
| 6 | -1.892701000 | -0.900311000 | 2.904046000  |
| 6 | -3.660231000 | -2.537986000 | 2.343274000  |
| 6 | -2.385038000 | -2.261010000 | 2.894866000  |
| 6 | -2.343693000 | 4.534560000  | 0.178565000  |
| 6 | -2.244343000 | 3.778568000  | 1.367029000  |

|   |              |              |              |
|---|--------------|--------------|--------------|
| 6 | -3.278129000 | 1.856671000  | 0.183877000  |
| 6 | -2.726151000 | 2.416659000  | 1.374335000  |
| 6 | -3.747962000 | 0.505042000  | 0.185497000  |
| 6 | -3.673895000 | -0.270645000 | 1.380472000  |
| 6 | -4.721191000 | -2.163701000 | 0.192366000  |
| 6 | -4.160825000 | -1.634700000 | 1.378787000  |
| 6 | -1.491429000 | 4.233751000  | -2.068808000 |
| 6 | -2.375833000 | 3.820771000  | -1.038364000 |
| 6 | -2.453677000 | 1.564484000  | -2.069969000 |
| 6 | -2.856341000 | 2.458551000  | -1.039446000 |
| 6 | -2.934545000 | 0.213545000  | -2.071328000 |
| 6 | -3.806784000 | -0.227403000 | -1.037307000 |
| 6 | -3.905257000 | -2.458155000 | -2.074570000 |
| 6 | -4.293411000 | -1.591161000 | -1.029692000 |
| 6 | 0.651838000  | 3.476645000  | -2.933910000 |
| 6 | -0.744261000 | 3.245987000  | -2.725426000 |
| 6 | -0.341833000 | 0.816730000  | -3.007570000 |
| 6 | -1.234521000 | 1.885485000  | -2.746357000 |
| 6 | -0.828467000 | -0.542128000 | -3.006838000 |
| 6 | -2.206943000 | -0.798815000 | -2.771753000 |
| 6 | -1.795344000 | -3.218665000 | -2.987122000 |
| 6 | -2.699414000 | -2.158865000 | -2.756365000 |
| 6 | 2.841802000  | 2.685376000  | -2.146698000 |
| 6 | 1.547296000  | 2.429450000  | -2.762797000 |
| 6 | 1.832591000  | 0.016506000  | -2.280322000 |
| 6 | 1.056153000  | 1.064720000  | -2.825771000 |
| 6 | 1.340902000  | -1.344026000 | -2.228479000 |
| 6 | 0.079407000  | -1.625237000 | -2.826162000 |
| 6 | 0.391118000  | -3.990857000 | -2.231344000 |
| 6 | -0.413385000 | -2.979528000 | -2.816627000 |
| 1 | -4.011568000 | -3.566994000 | 2.330845000  |
| 1 | -1.829173000 | -4.348667000 | 2.963591000  |
| 1 | -5.063523000 | -3.195757000 | 0.192741000  |
| 1 | 0.261504000  | -5.087137000 | 1.962896000  |
| 1 | -4.254661000 | -3.487778000 | -2.059601000 |
| 1 | 1.257693000  | -5.461972000 | -0.188276000 |
| 1 | -2.161429000 | -4.242497000 | -2.957471000 |
| 1 | 0.015354000  | -5.011968000 | -2.203527000 |
| 1 | -0.863108000 | 5.172424000  | 2.265855000  |
| 1 | 1.330901000  | 4.398481000  | 2.837118000  |
| 1 | -1.947775000 | 5.547419000  | 0.174864000  |
| 1 | 3.454348000  | 3.624854000  | 1.855440000  |
| 1 | -1.100731000 | 5.248231000  | -2.036663000 |
| 1 | 4.844306000  | 2.898431000  | -0.237678000 |
| 1 | 1.016718000  | 4.499121000  | -2.863557000 |
| 1 | 3.215772000  | 3.707607000  | -2.127268000 |
| 6 | 5.742540000  | -0.305646000 | 0.642174000  |
| 6 | 5.284490000  | -1.572364000 | 0.631970000  |
| 1 | 6.324348000  | -0.027505000 | 1.518889000  |
| 1 | 5.542969000  | -2.170589000 | 1.502041000  |

|                                                     |             |              |                             |
|-----------------------------------------------------|-------------|--------------|-----------------------------|
| 6                                                   | 5.606966000 | 0.812834000  | -0.383957000                |
| 1                                                   | 6.544272000 | 1.375974000  | -0.366160000                |
| 1                                                   | 5.527141000 | 0.381966000  | -1.383992000                |
| 6                                                   | 4.371721000 | -2.263962000 | -0.362364000                |
| 1                                                   | 4.647751000 | -2.011578000 | -1.390714000                |
| 1                                                   | 4.444805000 | -3.349121000 | -0.252936000                |
| Zero-point correction=                              |             |              | 0.661358 (Hartree/Particle) |
| Thermal correction to Energy=                       |             |              | 0.696039                    |
| Thermal correction to Enthalpy=                     |             |              | 0.696984                    |
| Thermal correction to Gibbs Free Energy=            |             |              | 0.606230                    |
| Sum of electronic and zero-point Energies=          |             |              | -2603.876333                |
| Sum of electronic and thermal Energies=             |             |              | -2603.841652                |
| Sum of electronic and thermal Enthalpies=           |             |              | -2603.840708                |
| <b>Sum of electronic and thermal Free Energies=</b> |             |              | <b>-2603.931462</b>         |
| <b>Number of imaginary frequencies = 0</b>          |             |              |                             |

### Optimized Geometries of pristine tubes with different length

#### (5,0)CNT with 11.34Å

|   |              |              |              |
|---|--------------|--------------|--------------|
| 6 | 1.697451000  | 4.599477000  | 1.086436000  |
| 6 | 2.281416000  | 3.847771000  | 0.001181000  |
| 6 | 1.719957000  | 1.765871000  | 1.203596000  |
| 6 | 2.238328000  | 2.475789000  | -0.001083000 |
| 6 | 1.716729000  | 0.385611000  | 1.207333000  |
| 6 | 2.172327000  | -0.337336000 | -0.002505000 |
| 6 | 1.714376000  | -2.455884000 | 1.167278000  |
| 6 | 2.196479000  | -1.718966000 | -0.002328000 |
| 6 | 1.758448000  | -3.868348000 | 1.192328000  |
| 6 | 2.154020000  | -4.561632000 | 0.001019000  |
| 6 | -0.644117000 | 4.593205000  | 1.743643000  |
| 6 | 0.590454000  | 3.923001000  | 1.742327000  |
| 6 | -0.638238000 | 1.760604000  | 1.834093000  |
| 6 | 0.599235000  | 2.489919000  | 1.768338000  |
| 6 | -0.628972000 | 0.348743000  | 1.839394000  |
| 6 | 0.621505000  | -0.349127000 | 1.833208000  |
| 6 | -0.604546000 | -2.491015000 | 1.774328000  |
| 6 | 0.632552000  | -1.758576000 | 1.828937000  |
| 6 | -0.591362000 | -3.926110000 | 1.748135000  |
| 6 | 0.648653000  | -4.592096000 | 1.744003000  |
| 6 | -2.150276000 | 4.567806000  | 0.000696000  |
| 6 | -1.758211000 | 3.874948000  | 1.192721000  |
| 6 | -2.203210000 | 1.722385000  | -0.000750000 |
| 6 | -1.721408000 | 2.459876000  | 1.170451000  |
| 6 | -2.179353000 | 0.337660000  | -0.001017000 |
| 6 | -1.726553000 | -0.385657000 | 1.211259000  |
| 6 | -2.241943000 | -2.478635000 | 0.000173000  |
| 6 | -1.728103000 | -1.768728000 | 1.206647000  |
| 6 | -2.283429000 | -3.854536000 | 0.001250000  |
| 6 | -1.693136000 | -4.607031000 | 1.082686000  |
| 6 | -0.645921000 | 4.597190000  | -1.740875000 |

|   |              |              |              |
|---|--------------|--------------|--------------|
| 6 | -1.757196000 | 3.875775000  | -1.190752000 |
| 6 | -0.638355000 | 1.761181000  | -1.836333000 |
| 6 | -1.718980000 | 2.460470000  | -1.169989000 |
| 6 | -0.628658000 | 0.350170000  | -1.842118000 |
| 6 | -1.722942000 | -0.385945000 | -1.211155000 |
| 6 | -0.603203000 | -2.493508000 | -1.773162000 |
| 6 | -1.724454000 | -1.769432000 | -1.205350000 |
| 6 | -0.590036000 | -3.927765000 | -1.743897000 |
| 6 | -1.691144000 | -4.608006000 | -1.078062000 |
| 6 | 1.698532000  | 4.603198000  | -1.082357000 |
| 6 | 0.592301000  | 3.927695000  | -1.744963000 |
| 6 | 1.723733000  | 1.768849000  | -1.207658000 |
| 6 | 0.601548000  | 2.493154000  | -1.774036000 |
| 6 | 1.720903000  | 0.385168000  | -1.213422000 |
| 6 | 0.624812000  | -0.349064000 | -1.843735000 |
| 6 | 1.719498000  | -2.456203000 | -1.173118000 |
| 6 | 0.636000000  | -1.759873000 | -1.838434000 |
| 6 | 1.760782000  | -3.871761000 | -1.192332000 |
| 6 | 0.648904000  | -4.595081000 | -1.740193000 |
| 1 | -0.653878000 | 5.680446000  | 1.732737000  |
| 1 | 1.866129000  | 5.661823000  | 1.214455000  |
| 1 | -2.230817000 | 5.651608000  | 0.001519000  |
| 1 | 1.866433000  | 5.669238000  | -1.202980000 |
| 1 | -0.660730000 | 5.684199000  | -1.731099000 |
| 1 | -1.854596000 | -5.673020000 | 1.208533000  |
| 1 | 0.666727000  | -5.678833000 | 1.731838000  |
| 1 | -1.852021000 | -5.674444000 | -1.202069000 |
| 1 | 2.236179000  | -5.645097000 | 0.003060000  |
| 1 | 0.665872000  | -5.681998000 | -1.727834000 |

Zero-point correction= 0.408669 (Hartree/Particle)  
 Thermal correction to Energy= 0.431854  
 Thermal correction to Enthalpy= 0.432798  
 Thermal correction to Gibbs Free Energy= 0.362740  
 Sum of electronic and zero-point Energies= -1910.456690  
 Sum of electronic and thermal Energies= -1910.433506  
 Sum of electronic and thermal Enthalpies= -1910.432561  
**Sum of electronic and thermal Free Energies= -1910.502619**  
**Number of imaginary frequencies = 0**

**(5,0)CNT with 13.49Å**

|   |             |              |              |
|---|-------------|--------------|--------------|
| 6 | 1.550785000 | 5.664726000  | 1.040849000  |
| 6 | 2.108610000 | 4.954001000  | -0.066655000 |
| 6 | 1.618313000 | 2.829724000  | 1.130463000  |
| 6 | 2.067807000 | 3.533319000  | -0.050570000 |
| 6 | 1.626184000 | 1.419349000  | 1.145174000  |
| 6 | 2.092654000 | 0.682723000  | -0.024029000 |
| 6 | 1.644423000 | -1.422163000 | 1.175230000  |
| 6 | 2.097188000 | -0.708233000 | -0.017349000 |
| 6 | 1.665023000 | -2.818588000 | 1.197945000  |

|   |              |              |              |
|---|--------------|--------------|--------------|
| 6 | 2.085878000  | -3.547740000 | -0.006868000 |
| 6 | 1.618536000  | -5.660667000 | 1.137607000  |
| 6 | 2.115712000  | -4.955024000 | -0.003121000 |
| 6 | -0.728888000 | 5.656424000  | 1.890156000  |
| 6 | 0.557540000  | 4.991243000  | 1.766184000  |
| 6 | -0.663556000 | 2.829628000  | 1.967107000  |
| 6 | 0.566847000  | 3.553188000  | 1.792502000  |
| 6 | -0.651005000 | 1.436445000  | 1.955899000  |
| 6 | 0.608818000  | 0.713211000  | 1.876108000  |
| 6 | -0.643862000 | -1.405447000 | 1.926470000  |
| 6 | 0.612172000  | -0.693813000 | 1.891372000  |
| 6 | -0.645517000 | -2.813203000 | 1.942258000  |
| 6 | 0.605865000  | -3.534227000 | 1.870700000  |
| 6 | -0.624019000 | -5.660182000 | 1.854310000  |
| 6 | 0.616528000  | -4.966032000 | 1.896054000  |
| 6 | -2.016676000 | 5.663720000  | 0.115917000  |
| 6 | -1.836358000 | 4.909353000  | 1.336362000  |
| 6 | -2.088081000 | 2.832669000  | 0.021404000  |
| 6 | -1.801885000 | 3.533165000  | 1.306167000  |
| 6 | -2.080261000 | 1.442761000  | 0.009776000  |
| 6 | -1.720723000 | 0.713373000  | 1.242626000  |
| 6 | -2.062624000 | -1.406101000 | 0.012546000  |
| 6 | -1.711262000 | -0.677399000 | 1.235149000  |
| 6 | -2.089693000 | -2.808985000 | 0.012207000  |
| 6 | -1.663069000 | -3.534039000 | 1.198131000  |
| 6 | -2.029528000 | -5.658214000 | 0.016978000  |
| 6 | -1.691718000 | -4.957476000 | 1.217866000  |
| 6 | -0.494634000 | 5.672083000  | -1.783941000 |
| 6 | -1.505708000 | 4.998658000  | -1.073153000 |
| 6 | -0.571486000 | 2.835891000  | -1.883804000 |
| 6 | -1.533835000 | 3.561787000  | -1.096738000 |
| 6 | -0.586667000 | 1.422447000  | -1.893106000 |
| 6 | -1.614935000 | 0.716498000  | -1.169081000 |
| 6 | -0.609786000 | -1.420997000 | -1.902594000 |
| 6 | -1.633914000 | -0.689790000 | -1.179026000 |
| 6 | -0.622683000 | -2.826585000 | -1.914509000 |
| 6 | -1.630383000 | -3.536176000 | -1.156790000 |
| 6 | -0.602109000 | -5.665351000 | -1.824470000 |
| 6 | -1.664704000 | -4.961596000 | -1.179620000 |
| 6 | 1.803345000  | 5.628270000  | -1.295712000 |
| 6 | 0.727601000  | 4.957026000  | -1.979669000 |
| 6 | 1.751033000  | 2.801360000  | -1.265084000 |
| 6 | 0.694499000  | 3.535829000  | -1.948572000 |
| 6 | 1.717476000  | 1.401150000  | -1.241313000 |
| 6 | 0.666491000  | 0.685367000  | -1.965467000 |
| 6 | 1.706442000  | -1.438899000 | -1.232308000 |
| 6 | 0.658679000  | -0.711338000 | -1.961960000 |
| 6 | 1.715511000  | -2.827820000 | -1.233140000 |
| 6 | 0.635494000  | -3.555369000 | -1.894259000 |
| 6 | 1.661662000  | -5.674862000 | -1.167415000 |

|   |              |              |              |
|---|--------------|--------------|--------------|
| 6 | 0.639910000  | -4.976180000 | -1.909869000 |
| 1 | -0.788885000 | 6.723268000  | 2.085841000  |
| 1 | 1.532278000  | 6.748736000  | 1.008868000  |
| 1 | -2.217916000 | 6.730738000  | 0.119058000  |
| 1 | 1.851636000  | 6.714067000  | -1.325291000 |
| 1 | -0.467822000 | 6.758439000  | -1.754383000 |
| 1 | -0.638605000 | -6.746168000 | 1.896499000  |
| 1 | -2.104737000 | -6.742273000 | 0.018110000  |
| 1 | 1.691304000  | -6.743439000 | 1.191655000  |
| 1 | -0.621442000 | -6.751347000 | -1.866047000 |
| 1 | 1.762022000  | -6.753819000 | -1.235638000 |

Zero-point correction= 0.469138 (Hartree/Particle)  
 Thermal correction to Energy= 0.496383  
 Thermal correction to Enthalpy= 0.497327  
 Thermal correction to Gibbs Free Energy= 0.419369  
 Sum of electronic and zero-point Energies= -2291.393074  
 Sum of electronic and thermal Energies= -2291.365829  
 Sum of electronic and thermal Enthalpies= -2291.364884  
**Sum of electronic and thermal Free Energies= -2291.442842**  
**Number of imaginary frequencies = 0**

#### (5,0)CNT with 15.63Å

|   |              |              |              |
|---|--------------|--------------|--------------|
| 6 | 1.604636000  | 6.725922000  | 1.167223000  |
| 6 | 2.049551000  | 6.025933000  | 0.001718000  |
| 6 | 1.666653000  | 3.885193000  | 1.211444000  |
| 6 | 2.013438000  | 4.607936000  | -0.000631000 |
| 6 | 1.645092000  | 2.485567000  | 1.195568000  |
| 6 | 2.048340000  | 1.764166000  | -0.002864000 |
| 6 | 1.650441000  | -0.359549000 | 1.198748000  |
| 6 | 2.039220000  | 0.362691000  | -0.002822000 |
| 6 | 1.663725000  | -1.760392000 | 1.207931000  |
| 6 | 2.043120000  | -2.483256000 | -0.000434000 |
| 6 | 1.636715000  | -4.607476000 | 1.187477000  |
| 6 | 2.067467000  | -3.885945000 | 0.000542000  |
| 6 | 1.666210000  | -6.027904000 | 1.208292000  |
| 6 | 1.986396000  | -6.729880000 | 0.002167000  |
| 6 | -0.610663000 | 6.730222000  | 1.886193000  |
| 6 | 0.633164000  | 6.025486000  | 1.950077000  |
| 6 | -0.640211000 | 3.888458000  | 1.962333000  |
| 6 | 0.620333000  | 4.607493000  | 1.915992000  |
| 6 | -0.634279000 | 2.484966000  | 1.938921000  |
| 6 | 0.629670000  | 1.763694000  | 1.949306000  |
| 6 | -0.635229000 | -0.359847000 | 1.945495000  |
| 6 | 0.627303000  | 0.362178000  | 1.940270000  |
| 6 | -0.636241000 | -1.764152000 | 1.956052000  |
| 6 | 0.631590000  | -2.483871000 | 1.942148000  |
| 6 | -0.621159000 | -4.609977000 | 1.920407000  |
| 6 | 0.640335000  | -3.886621000 | 1.964370000  |
| 6 | -0.629767000 | -6.030440000 | 1.953524000  |



|   |              |              |              |
|---|--------------|--------------|--------------|
| 6 | 0.617844000  | -6.730170000 | 1.885593000  |
| 6 | -1.983821000 | 6.735840000  | 0.000659000  |
| 6 | -1.661317000 | 6.032267000  | 1.206451000  |
| 6 | -2.068173000 | 3.890128000  | -0.001041000 |
| 6 | -1.635648000 | 4.611481000  | 1.184998000  |
| 6 | -2.044335000 | 2.487237000  | -0.001805000 |
| 6 | -1.668724000 | 1.764319000  | 1.206908000  |
| 6 | -2.048927000 | -0.362739000 | -0.001646000 |
| 6 | -1.660146000 | 0.360729000  | 1.201072000  |
| 6 | -2.057073000 | -1.766395000 | -0.000839000 |
| 6 | -1.651170000 | -2.487772000 | 1.198978000  |
| 6 | -2.017286000 | -4.612805000 | 0.000290000  |
| 6 | -1.668768000 | -3.889882000 | 1.213520000  |
| 6 | -2.049801000 | -6.033125000 | 0.001171000  |
| 6 | -1.596842000 | -6.733562000 | 1.165132000  |
| 6 | -0.614227000 | 6.736103000  | -1.883715000 |
| 6 | -1.662669000 | 6.033912000  | -1.205671000 |
| 6 | -0.640936000 | 3.890821000  | -1.964589000 |
| 6 | -1.635462000 | 4.613170000  | -1.186469000 |
| 6 | -0.634058000 | 2.487853000  | -1.942399000 |
| 6 | -1.665914000 | 1.764843000  | -1.209474000 |
| 6 | -0.634613000 | -0.362183000 | -1.948053000 |
| 6 | -1.657112000 | 0.360478000  | -1.203519000 |
| 6 | -0.635971000 | -1.765888000 | -1.956487000 |
| 6 | -1.651306000 | -2.488952000 | -1.200060000 |
| 6 | -0.621871000 | -4.612252000 | -1.919827000 |
| 6 | -1.669849000 | -3.891004000 | -1.213830000 |
| 6 | -0.630524000 | -6.032549000 | -1.951549000 |
| 6 | -1.597957000 | -6.735004000 | -1.162567000 |
| 6 | 1.603455000  | 6.731384000  | -1.160419000 |
| 6 | 0.632838000  | 6.033287000  | -1.950023000 |
| 6 | 1.667900000  | 3.889198000  | -1.213651000 |
| 6 | 0.620878000  | 4.612327000  | -1.919894000 |
| 6 | 1.647567000  | 2.485867000  | -1.201108000 |
| 6 | 0.632056000  | 1.765320000  | -1.959240000 |
| 6 | 1.654115000  | -0.359033000 | -1.205069000 |
| 6 | 0.629513000  | 0.361551000  | -1.949906000 |
| 6 | 1.664313000  | -1.763138000 | -1.209878000 |
| 6 | 0.631065000  | -2.486813000 | -1.941742000 |
| 6 | 1.635904000  | -4.609101000 | -1.185484000 |
| 6 | 0.639803000  | -3.889057000 | -1.963280000 |
| 6 | 1.665478000  | -6.029414000 | -1.204721000 |
| 6 | 0.617084000  | -6.732332000 | -1.881580000 |
| 1 | -0.631358000 | 7.813564000  | 1.970776000  |
| 1 | 1.680784000  | 7.806085000  | 1.222565000  |
| 1 | -2.070812000 | 7.818892000  | 0.001990000  |
| 1 | 1.676542000  | 7.814823000  | -1.205222000 |
| 1 | -0.640049000 | 7.819185000  | -1.966406000 |
| 1 | 0.645098000  | -7.813499000 | 1.966028000  |
| 1 | -1.662711000 | -7.817098000 | 1.214522000  |

|   |              |              |              |
|---|--------------|--------------|--------------|
| 1 | 2.071595000  | -7.813190000 | 0.002875000  |
| 1 | -1.664533000 | -7.818529000 | -1.211156000 |
| 1 | 0.644275000  | -7.815772000 | -1.960651000 |

Zero-point correction= 0.529549 (Hartree/Particle)  
 Thermal correction to Energy= 0.560726  
 Thermal correction to Enthalpy= 0.561670  
 Thermal correction to Gibbs Free Energy= 0.476484  
 Sum of electronic and zero-point Energies= -2672.338098  
 Sum of electronic and thermal Energies= -2672.306921  
 Sum of electronic and thermal Enthalpies= -2672.305977  
**Sum of electronic and thermal Free Energies= -2672.391163**  
**Number of imaginary frequencies = 0**

### Optimized Geometries of TSs with different length

#### (5,0)CNT<sub>TS</sub> of 11.34Å

|   |              |              |              |
|---|--------------|--------------|--------------|
| 6 | -4.555836000 | 1.493410000  | -0.221256000 |
| 6 | -3.879302000 | 0.780984000  | -1.320491000 |
| 6 | -1.902003000 | 1.702426000  | -0.229791000 |
| 6 | -2.465906000 | 0.892520000  | -1.296187000 |
| 6 | -0.427281000 | 2.037130000  | -0.236874000 |
| 6 | 0.349123000  | 1.240036000  | -1.333589000 |
| 6 | 2.409356000  | 2.000832000  | -0.207020000 |
| 6 | 1.731171000  | 1.372128000  | -1.353428000 |
| 6 | 3.799725000  | 2.168949000  | -0.209752000 |
| 6 | 4.574840000  | 1.624778000  | -1.289721000 |
| 6 | -4.477915000 | -0.081667000 | 1.668770000  |
| 6 | -3.899469000 | 1.002403000  | 1.000108000  |
| 6 | -1.663167000 | 0.177194000  | 1.677167000  |
| 6 | -2.489304000 | 1.118766000  | 0.973683000  |
| 6 | -0.262500000 | 0.335023000  | 1.668533000  |
| 6 | 0.327260000  | 1.456563000  | 1.001729000  |
| 6 | 2.533894000  | 0.643051000  | 1.731953000  |
| 6 | 1.708626000  | 1.594200000  | 1.024475000  |
| 6 | 3.959395000  | 0.803704000  | 1.761212000  |
| 6 | 4.553058000  | 1.834987000  | 0.966121000  |
| 6 | -4.235735000 | -2.403888000 | 1.273967000  |
| 6 | -3.659229000 | -1.249190000 | 1.867230000  |
| 6 | -1.394098000 | -2.217948000 | 1.366946000  |
| 6 | -2.239703000 | -1.122270000 | 1.847978000  |
| 6 | -0.018775000 | -2.062445000 | 1.356544000  |
| 6 | 0.573884000  | -0.823894000 | 1.868492000  |
| 6 | 2.808143000  | -1.716723000 | 1.325293000  |
| 6 | 1.963679000  | -0.671390000 | 1.895756000  |
| 6 | 4.213121000  | -1.572371000 | 1.349395000  |
| 6 | 4.779098000  | -0.360087000 | 1.843751000  |
| 6 | -4.215110000 | -2.615928000 | -0.968354000 |
| 6 | -3.459637000 | -2.983087000 | 0.204501000  |

|   |              |              |              |
|---|--------------|--------------|--------------|
| 6 | -1.371402000 | -2.446692000 | -1.043956000 |
| 6 | -2.063158000 | -2.810829000 | 0.200883000  |
| 6 | 0.004128000  | -2.286864000 | -1.035962000 |
| 6 | 0.774205000  | -2.549750000 | 0.202919000  |
| 6 | 2.831090000  | -1.934967000 | -1.013718000 |
| 6 | 2.145314000  | -2.396290000 | 0.202361000  |
| 6 | 4.236370000  | -1.794032000 | -1.035825000 |
| 6 | 4.976447000  | -1.965033000 | 0.190384000  |
| 6 | -4.447615000 | -0.408042000 | -1.789897000 |
| 6 | -3.626305000 | -1.592060000 | -1.757633000 |
| 6 | -1.628623000 | -0.155248000 | -1.806721000 |
| 6 | -2.206047000 | -1.463950000 | -1.738848000 |
| 6 | -0.228978000 | 0.009676000  | -1.795881000 |
| 6 | 0.609379000  | -1.164100000 | -1.758573000 |
| 6 | 2.568523000  | 0.307516000  | -1.857206000 |
| 6 | 1.999753000  | -1.015468000 | -1.783859000 |
| 6 | 3.994212000  | 0.462242000  | -1.888544000 |
| 6 | 4.813561000  | -0.694655000 | -1.737086000 |
| 1 | -5.560230000 | -0.194749000 | 1.666523000  |
| 1 | -5.634893000 | 1.617817000  | -0.243975000 |
| 1 | -5.310077000 | -2.563138000 | 1.318823000  |
| 1 | -5.529850000 | -0.521930000 | -1.787228000 |
| 1 | -5.288727000 | -2.782502000 | -1.001543000 |
| 6 | -2.436676000 | 4.320952000  | 0.582766000  |
| 6 | -1.084739000 | 4.343994000  | 0.627192000  |
| 1 | -2.992017000 | 4.789167000  | 1.391749000  |
| 1 | -0.579400000 | 4.846348000  | 1.444629000  |
| 6 | -3.199088000 | 3.658823000  | -0.453685000 |
| 1 | -4.258820000 | 3.873706000  | -0.449502000 |
| 1 | -2.790231000 | 3.634374000  | -1.456950000 |
| 6 | -0.261282000 | 3.606595000  | -0.377253000 |
| 1 | 0.793212000  | 3.862460000  | -0.288868000 |
| 1 | -0.567116000 | 3.846921000  | -1.400283000 |
| 1 | 5.624101000  | 2.011443000  | 1.007499000  |
| 1 | 5.646836000  | 1.792048000  | -1.342510000 |
| 1 | 5.859491000  | -0.249669000 | 1.893351000  |
| 1 | 5.894844000  | -0.592695000 | -1.784966000 |
| 1 | 6.062078000  | -1.949692000 | 0.199258000  |

|                                                        |                             |
|--------------------------------------------------------|-----------------------------|
| Zero-point correction=                                 | 0.498672 (Hartree/Particle) |
| Thermal correction to Energy=                          | 0.525167                    |
| Thermal correction to Enthalpy=                        | 0.526111                    |
| Thermal correction to Gibbs Free Energy=               | 0.450210                    |
| Sum of electronic and zero-point Energies=             | -2066.412294                |
| Sum of electronic and thermal Energies=                | -2066.385799                |
| Sum of electronic and thermal Enthalpies=              | -2066.384855                |
| <b>Sum of electronic and thermal Free Energies=</b>    | <b>-2066.460756</b>         |
| <b>Number of imaginary frequencies = 1 (-443.6453)</b> |                             |

**(5,0)CNT<sub>TS</sub> of 13.49Å**

|   |              |              |              |
|---|--------------|--------------|--------------|
| 6 | -5.534883000 | 1.559099000  | -0.220743000 |
| 6 | -4.867783000 | 0.839150000  | -1.319999000 |
| 6 | -2.864436000 | 1.713833000  | -0.229237000 |
| 6 | -3.449670000 | 0.921115000  | -1.296705000 |
| 6 | -1.383024000 | 2.011034000  | -0.235781000 |
| 6 | -0.622846000 | 1.204556000  | -1.339579000 |
| 6 | 1.452204000  | 1.926693000  | -0.204859000 |
| 6 | 0.759540000  | 1.304007000  | -1.353969000 |
| 6 | 2.827539000  | 2.049095000  | -0.205463000 |
| 6 | 3.603619000  | 1.518890000  | -1.325478000 |
| 6 | 5.685125000  | 2.186056000  | -0.194862000 |
| 6 | 5.019209000  | 1.656208000  | -1.349706000 |
| 6 | -5.484299000 | -0.005685000 | 1.677066000  |
| 6 | -4.883439000 | 1.060764000  | 0.999736000  |
| 6 | -2.662314000 | 0.190404000  | 1.683120000  |
| 6 | -3.468809000 | 1.147569000  | 0.974374000  |
| 6 | -1.254887000 | 0.318206000  | 1.676343000  |
| 6 | -0.641165000 | 1.424907000  | 1.010683000  |
| 6 | 1.543207000  | 0.571576000  | 1.771291000  |
| 6 | 0.740336000  | 1.528264000  | 1.030028000  |
| 6 | 2.948918000  | 0.699534000  | 1.792747000  |
| 6 | 3.584973000  | 1.737207000  | 1.005490000  |
| 6 | 5.779592000  | 0.927539000  | 1.747823000  |
| 6 | 5.000219000  | 1.879684000  | 1.028100000  |
| 6 | -5.289514000 | -2.329651000 | 1.276119000  |
| 6 | -4.691595000 | -1.191372000 | 1.868581000  |
| 6 | -2.444528000 | -2.202966000 | 1.361249000  |
| 6 | -3.263632000 | -1.093760000 | 1.846010000  |
| 6 | -1.060971000 | -2.071755000 | 1.345899000  |
| 6 | -0.443253000 | -0.858394000 | 1.882786000  |
| 6 | 1.774306000  | -1.811713000 | 1.353455000  |
| 6 | 0.947201000  | -0.738360000 | 1.911134000  |
| 6 | 3.155456000  | -1.690695000 | 1.363088000  |
| 6 | 3.773407000  | -0.482482000 | 1.884246000  |
| 6 | 5.989974000  | -1.380726000 | 1.285075000  |
| 6 | 5.198071000  | -0.359271000 | 1.912986000  |
| 6 | -5.273198000 | -2.542796000 | -0.974563000 |
| 6 | -4.530086000 | -2.919360000 | 0.202152000  |
| 6 | -2.426063000 | -2.431602000 | -1.041133000 |
| 6 | -3.125538000 | -2.775389000 | 0.198783000  |
| 6 | -1.042514000 | -2.295396000 | -1.028421000 |
| 6 | -0.276430000 | -2.580328000 | 0.202279000  |
| 6 | 1.793703000  | -2.036121000 | -1.038285000 |
| 6 | 1.097228000  | -2.445565000 | 0.200986000  |
| 6 | 3.174918000  | -1.916603000 | -1.047628000 |
| 6 | 3.927822000  | -2.143272000 | 0.195618000  |
| 6 | 6.008314000  | -1.593140000 | -0.983719000 |
| 6 | 5.330095000  | -2.043508000 | 0.197548000  |
| 6 | -5.460281000 | -0.333669000 | -1.799763000 |
| 6 | -4.665370000 | -1.534481000 | -1.760642000 |

|   |              |              |              |
|---|--------------|--------------|--------------|
| 6 | -2.634128000 | -0.143597000 | -1.812699000 |
| 6 | -3.236519000 | -1.435414000 | -1.738491000 |
| 6 | -1.227095000 | -0.009407000 | -1.802781000 |
| 6 | -0.413624000 | -1.202101000 | -1.772645000 |
| 6 | 1.572667000  | 0.228041000  | -1.893564000 |
| 6 | 0.977306000  | -1.086188000 | -1.797967000 |
| 6 | 2.978702000  | 0.351926000  | -1.915412000 |
| 6 | 3.802845000  | -0.825466000 | -1.774870000 |
| 6 | 5.808796000  | 0.589074000  | -1.868455000 |
| 6 | 5.227957000  | -0.706908000 | -1.802144000 |
| 1 | -6.568670000 | -0.096501000 | 1.672863000  |
| 1 | -6.613498000 | 1.687125000  | -0.241744000 |
| 1 | -6.369156000 | -2.453916000 | 1.308675000  |
| 1 | -6.544621000 | -0.424996000 | -1.795533000 |
| 1 | -6.352483000 | -2.671787000 | -0.997824000 |
| 6 | -3.330878000 | 4.353836000  | 0.585595000  |
| 6 | -1.977332000 | 4.336963000  | 0.626702000  |
| 1 | -3.871061000 | 4.832462000  | 1.398747000  |
| 1 | -1.455093000 | 4.820047000  | 1.445106000  |
| 6 | -4.110647000 | 3.721849000  | -0.451256000 |
| 1 | -5.167333000 | 3.947282000  | -0.441667000 |
| 1 | -3.702805000 | 3.675962000  | -1.453620000 |
| 6 | -1.180595000 | 3.578545000  | -0.380726000 |
| 1 | -0.119028000 | 3.805146000  | -0.299211000 |
| 1 | -1.485660000 | 3.824130000  | -1.402618000 |
| 1 | 6.758703000  | 2.350570000  | -0.201975000 |
| 1 | 6.861008000  | 1.034365000  | 1.781738000  |
| 1 | 6.890857000  | 0.689035000  | -1.901978000 |
| 1 | 7.074052000  | -1.354154000 | 1.347949000  |
| 1 | 7.093366000  | -1.575662000 | -1.032191000 |

Zero-point correction= 0.560333 (Hartree/Particle)  
 Thermal correction to Energy= 0.590691  
 Thermal correction to Enthalpy= 0.591635  
 Thermal correction to Gibbs Free Energy= 0.508930  
 Sum of electronic and zero-point Energies= -2447.346235  
 Sum of electronic and thermal Energies= -2447.315877  
 Sum of electronic and thermal Enthalpies= -2447.314933  
**Sum of electronic and thermal Free Energies= -2447.397639**  
**Number of imaginary frequencies = 1 (-416.1850)**

**(5,0)CNT<sub>TS</sub> of 15.63Å**

|   |              |             |              |
|---|--------------|-------------|--------------|
| 6 | -6.534295000 | 1.616324000 | -0.221547000 |
| 6 | -5.873591000 | 0.891983000 | -1.320389000 |
| 6 | -3.850128000 | 1.729821000 | -0.230162000 |
| 6 | -4.452526000 | 0.951396000 | -1.298458000 |
| 6 | -2.364877000 | 2.002490000 | -0.236962000 |
| 6 | -1.617549000 | 1.185848000 | -1.342771000 |
| 6 | 0.469823000  | 1.879760000 | -0.206089000 |
| 6 | -0.232559000 | 1.259441000 | -1.351496000 |

|   |              |              |              |
|---|--------------|--------------|--------------|
| 6 | 1.844646000  | 1.964229000  | -0.205174000 |
| 6 | 2.610179000  | 1.441245000  | -1.347511000 |
| 6 | 4.697920000  | 2.088657000  | -0.198087000 |
| 6 | 4.006089000  | 1.544413000  | -1.360048000 |
| 6 | 6.112292000  | 2.212658000  | -0.200851000 |
| 6 | 6.854974000  | 1.679134000  | -1.300747000 |
| 6 | -6.503715000 | 0.062187000  | 1.683219000  |
| 6 | -5.885819000 | 1.115034000  | 0.998164000  |
| 6 | -3.677198000 | 0.210129000  | 1.685938000  |
| 6 | -4.468389000 | 1.179405000  | 0.974037000  |
| 6 | -2.264347000 | 0.314856000  | 1.677289000  |
| 6 | -1.632768000 | 1.409342000  | 1.012269000  |
| 6 | 0.537441000  | 0.525256000  | 1.784414000  |
| 6 | -0.248692000 | 1.485640000  | 1.027124000  |
| 6 | 1.941012000  | 0.630567000  | 1.807882000  |
| 6 | 2.594642000  | 1.666899000  | 1.025025000  |
| 6 | 4.777188000  | 0.820569000  | 1.792823000  |
| 6 | 3.990204000  | 1.772924000  | 1.037152000  |
| 6 | 6.205109000  | 0.927871000  | 1.824048000  |
| 6 | 6.839886000  | 1.896824000  | 0.989082000  |
| 6 | -6.344856000 | -2.263630000 | 1.278994000  |
| 6 | -5.731276000 | -1.136180000 | 1.870145000  |
| 6 | -3.499515000 | -2.181946000 | 1.359049000  |
| 6 | -4.297468000 | -1.061220000 | 1.845939000  |
| 6 | -2.109564000 | -2.069850000 | 1.341099000  |
| 6 | -1.473294000 | -0.873921000 | 1.886484000  |
| 6 | 0.732363000  | -1.863429000 | 1.360346000  |
| 6 | -0.078553000 | -0.776671000 | 1.913067000  |
| 6 | 2.112706000  | -1.758755000 | 1.366387000  |
| 6 | 2.747718000  | -0.568351000 | 1.932666000  |
| 6 | 4.949082000  | -1.513814000 | 1.328740000  |
| 6 | 4.147509000  | -0.469271000 | 1.954714000  |
| 6 | 6.365198000  | -1.433621000 | 1.351365000  |
| 6 | 6.983584000  | -0.266365000 | 1.887633000  |
| 6 | -6.331806000 | -2.479105000 | -0.977327000 |
| 6 | -5.597663000 | -2.862526000 | 0.202444000  |
| 6 | -3.484275000 | -2.412185000 | -1.037470000 |
| 6 | -4.187771000 | -2.742644000 | 0.199558000  |
| 6 | -2.094511000 | -2.294720000 | -1.022039000 |
| 6 | -1.333791000 | -2.592597000 | 0.203796000  |
| 6 | 0.748516000  | -2.090786000 | -1.040309000 |
| 6 | 0.045266000  | -2.469959000 | 0.201895000  |
| 6 | 2.128981000  | -1.987483000 | -1.046960000 |
| 6 | 2.881128000  | -2.232623000 | 0.198737000  |
| 6 | 4.964631000  | -1.737229000 | -1.019035000 |
| 6 | 4.262652000  | -2.139700000 | 0.199203000  |
| 6 | 6.380731000  | -1.660630000 | -1.036526000 |
| 6 | 7.105651000  | -1.848163000 | 0.190747000  |
| 6 | -6.484458000 | -0.269261000 | -1.807344000 |
| 6 | -5.710118000 | -1.481805000 | -1.761775000 |

|   |              |              |              |
|---|--------------|--------------|--------------|
| 6 | -3.653994000 | -0.127175000 | -1.816148000 |
| 6 | -4.275297000 | -1.405406000 | -1.737880000 |
| 6 | -2.241256000 | -0.016056000 | -1.804021000 |
| 6 | -1.448662000 | -1.221428000 | -1.774254000 |
| 6 | 0.562088000  | 0.175513000  | -1.906433000 |
| 6 | -0.053483000 | -1.128306000 | -1.797511000 |
| 6 | 1.965940000  | 0.275984000  | -1.930169000 |
| 6 | 2.772862000  | -0.924425000 | -1.819334000 |
| 6 | 4.801699000  | 0.468812000  | -1.913869000 |
| 6 | 4.172766000  | -0.829330000 | -1.840317000 |
| 6 | 6.229928000  | 0.569832000  | -1.946001000 |
| 6 | 7.007694000  | -0.614172000 | -1.774380000 |
| 1 | -7.589319000 | -0.011537000 | 1.677497000  |
| 1 | -7.613085000 | 1.742945000  | -0.240946000 |
| 1 | -7.427373000 | -2.363613000 | 1.304442000  |
| 1 | -7.570055000 | -0.343229000 | -1.801932000 |
| 1 | -7.414131000 | -2.582360000 | -0.994962000 |
| 1 | 7.919184000  | 2.019446000  | 1.019923000  |
| 1 | 8.067511000  | -0.201596000 | 1.937358000  |
| 1 | 7.934783000  | 1.794810000  | -1.339989000 |
| 1 | 8.191518000  | -1.861820000 | 0.198935000  |
| 1 | 8.092204000  | -0.558476000 | -1.821526000 |
| 6 | -4.265956000 | 4.387566000  | 0.586078000  |
| 6 | -2.911394000 | 4.339947000  | 0.624956000  |
| 1 | -4.794398000 | 4.871272000  | 1.403913000  |
| 1 | -2.377643000 | 4.805561000  | 1.446041000  |
| 6 | -5.057834000 | 3.782574000  | -0.451877000 |
| 1 | -6.112851000 | 4.012500000  | -0.438304000 |
| 1 | -4.650285000 | 3.715305000  | -1.452584000 |
| 6 | -2.134750000 | 3.568083000  | -0.385090000 |
| 1 | -1.068614000 | 3.772779000  | -0.308813000 |
| 1 | -2.440044000 | 3.817159000  | -1.405924000 |

Zero-point correction= 0.621299 (Hartree/Particle)  
 Thermal correction to Energy= 0.655693  
 Thermal correction to Enthalpy= 0.656637  
 Thermal correction to Gibbs Free Energy= 0.566714  
 Sum of electronic and zero-point Energies= -2828.278323  
 Sum of electronic and thermal Energies= -2828.243929  
 Sum of electronic and thermal Enthalpies= -2828.242985  
**Sum of electronic and thermal Free Energies= -2828.332909**  
**Number of imaginary frequencies = 1 (-400.8332)**

### Optimized Geometries of [4+2] adduct with different length

#### (5,0) Adduct of 11.34Å

|   |             |             |             |
|---|-------------|-------------|-------------|
| 6 | 4.679549000 | 1.356457000 | 0.206035000 |
| 6 | 3.900941000 | 0.900009000 | 1.342148000 |
| 6 | 1.926151000 | 2.028346000 | 0.247685000 |
| 6 | 2.491770000 | 1.040333000 | 1.285614000 |

|   |              |              |              |
|---|--------------|--------------|--------------|
| 6 | 0.332514000  | 2.142904000  | 0.246196000  |
| 6 | -0.372261000 | 1.268877000  | 1.319414000  |
| 6 | -2.466720000 | 1.943984000  | 0.205771000  |
| 6 | -1.760643000 | 1.339181000  | 1.353313000  |
| 6 | -3.860052000 | 2.056005000  | 0.205970000  |
| 6 | -4.613792000 | 1.479956000  | 1.285090000  |
| 6 | 4.505887000  | 0.024999000  | -1.688971000 |
| 6 | 3.918086000  | 1.110943000  | -1.004511000 |
| 6 | 1.698873000  | 0.249131000  | -1.588030000 |
| 6 | 2.507889000  | 1.242962000  | -0.944935000 |
| 6 | 0.291176000  | 0.364029000  | -1.608227000 |
| 6 | -0.355763000 | 1.479858000  | -0.980876000 |
| 6 | -2.527101000 | 0.564149000  | -1.716147000 |
| 6 | -1.743772000 | 1.554760000  | -1.022644000 |
| 6 | -3.961121000 | 0.670190000  | -1.751989000 |
| 6 | -4.597222000 | 1.686497000  | -0.970183000 |
| 6 | 4.331477000  | -2.314212000 | -1.273916000 |
| 6 | 3.720536000  | -1.155520000 | -1.841831000 |
| 6 | 1.486647000  | -2.173664000 | -1.359191000 |
| 6 | 2.298872000  | -1.039805000 | -1.782049000 |
| 6 | 0.113818000  | -2.060833000 | -1.352253000 |
| 6 | -0.505381000 | -0.819558000 | -1.824128000 |
| 6 | -2.711151000 | -1.806810000 | -1.321214000 |
| 6 | -1.903442000 | -0.722973000 | -1.868296000 |
| 6 | -4.121733000 | -1.713973000 | -1.351165000 |
| 6 | -4.732907000 | -0.522574000 | -1.843597000 |
| 6 | 4.315955000  | -2.519814000 | 0.972034000  |
| 6 | 3.570291000  | -2.902913000 | -0.200287000 |
| 6 | 1.470015000  | -2.393498000 | 1.042675000  |
| 6 | 2.175294000  | -2.771579000 | -0.198043000 |
| 6 | 0.096607000  | -2.280010000 | 1.036585000  |
| 6 | -0.663838000 | -2.588819000 | -0.201678000 |
| 6 | -2.728490000 | -2.019196000 | 1.009553000  |
| 6 | -2.033798000 | -2.483599000 | -0.202517000 |
| 6 | -4.139561000 | -1.931174000 | 1.034418000  |
| 6 | -4.869743000 | -2.131241000 | -0.192039000 |
| 6 | 4.480879000  | -0.296604000 | 1.819662000  |
| 6 | 3.695829000  | -1.484587000 | 1.735335000  |
| 6 | 1.674583000  | -0.056569000 | 1.721051000  |
| 6 | 2.274280000  | -1.358747000 | 1.678970000  |
| 6 | 0.267293000  | 0.054417000  | 1.740326000  |
| 6 | -0.531272000 | -1.146671000 | 1.719309000  |
| 6 | -2.553061000 | 0.237350000  | 1.840791000  |
| 6 | -1.930270000 | -1.056402000 | 1.758013000  |
| 6 | -3.987204000 | 0.336112000  | 1.874835000  |
| 6 | -4.758769000 | -0.851267000 | 1.730561000  |
| 1 | 5.590541000  | -0.050048000 | -1.728546000 |
| 1 | 5.761754000  | 1.382743000  | 0.216269000  |
| 1 | 5.405926000  | -2.461308000 | -1.341944000 |
| 1 | 5.564863000  | -0.377877000 | 1.864412000  |



|   |              |              |              |
|---|--------------|--------------|--------------|
| 1 | 5.389438000  | -2.678668000 | 1.027412000  |
| 6 | 1.979202000  | 4.406477000  | -0.609141000 |
| 6 | 0.652161000  | 4.506516000  | -0.607592000 |
| 1 | 2.615129000  | 4.959504000  | -1.291635000 |
| 1 | 0.106428000  | 5.150368000  | -1.288534000 |
| 6 | 2.570049000  | 3.442741000  | 0.378508000  |
| 1 | 3.651144000  | 3.376012000  | 0.271134000  |
| 1 | 2.386778000  | 3.787541000  | 1.403894000  |
| 6 | -0.079596000 | 3.644366000  | 0.379856000  |
| 1 | -1.155979000 | 3.750385000  | 0.275257000  |
| 1 | 0.158768000  | 3.956113000  | 1.404518000  |
| 1 | -5.674603000 | 1.817734000  | -1.014529000 |
| 1 | -5.691907000 | 1.602017000  | 1.337088000  |
| 1 | -5.816993000 | -0.452602000 | -1.887806000 |
| 1 | -5.843472000 | -0.787691000 | 1.768753000  |
| 1 | -5.955568000 | -2.147844000 | -0.201364000 |

Zero-point correction= 0.502228 (Hartree/Particle)  
 Thermal correction to Energy= 0.528555  
 Thermal correction to Enthalpy= 0.529499  
 Thermal correction to Gibbs Free Energy= 0.454008  
 Sum of electronic and zero-point Energies= -2066.475872  
 Sum of electronic and thermal Energies= -2066.449545  
 Sum of electronic and thermal Enthalpies= -2066.448601  
**Sum of electronic and thermal Free Energies= -2066.524093**  
**Number of imaginary frequencies = 0**

**(5,0) Adduct of 13.49Å**

|   |              |             |              |
|---|--------------|-------------|--------------|
| 6 | 5.679755000  | 1.364600000 | 0.205783000  |
| 6 | 4.901379000  | 0.894597000 | 1.339198000  |
| 6 | 2.919689000  | 2.016940000 | 0.246944000  |
| 6 | 3.490070000  | 1.032497000 | 1.286175000  |
| 6 | 1.325343000  | 2.125831000 | 0.245853000  |
| 6 | 0.621582000  | 1.255977000 | 1.327293000  |
| 6 | -1.473864000 | 1.927849000 | 0.205065000  |
| 6 | -0.763717000 | 1.320928000 | 1.356397000  |
| 6 | -2.848788000 | 2.024652000 | 0.204247000  |
| 6 | -3.614411000 | 1.477355000 | 1.323594000  |
| 6 | -5.708317000 | 2.103451000 | 0.190539000  |
| 6 | -5.032635000 | 1.585199000 | 1.346079000  |
| 6 | 5.504445000  | 0.032944000 | -1.706007000 |
| 6 | 4.917637000  | 1.105499000 | -1.003760000 |
| 6 | 2.695097000  | 0.246178000 | -1.598388000 |
| 6 | 3.505289000  | 1.235912000 | -0.946951000 |
| 6 | 1.285431000  | 0.360411000 | -1.620488000 |
| 6 | 0.637665000  | 1.471119000 | -0.990533000 |
| 6 | -1.528750000 | 0.558187000 | -1.754577000 |
| 6 | -0.746980000 | 1.539748000 | -1.028059000 |
| 6 | -2.938731000 | 0.659498000 | -1.782097000 |
| 6 | -3.597961000 | 1.691551000 | -1.006511000 |

|   |              |              |              |
|---|--------------|--------------|--------------|
| 6 | -5.773873000 | 0.833761000  | -1.748395000 |
| 6 | -5.016034000 | 1.804328000  | -1.030852000 |
| 6 | 5.335376000  | -2.293759000 | -1.282614000 |
| 6 | 4.719473000  | -1.150525000 | -1.860626000 |
| 6 | 2.486442000  | -2.168497000 | -1.355491000 |
| 6 | 3.293924000  | -1.039313000 | -1.792302000 |
| 6 | 1.108212000  | -2.054802000 | -1.341222000 |
| 6 | 0.488646000  | -0.826920000 | -1.840080000 |
| 6 | -1.716770000 | -1.833958000 | -1.350615000 |
| 6 | -0.905649000 | -0.735867000 | -1.884348000 |
| 6 | -3.098509000 | -1.736698000 | -1.363648000 |
| 6 | -3.738195000 | -0.536922000 | -1.876962000 |
| 6 | -5.938999000 | -1.479506000 | -1.285688000 |
| 6 | -5.166899000 | -0.441094000 | -1.907640000 |
| 6 | 5.321024000  | -2.501533000 | 0.981296000  |
| 6 | 4.585081000  | -2.868947000 | -0.198333000 |
| 6 | 2.470837000  | -2.388900000 | 1.040072000  |
| 6 | 3.180142000  | -2.741774000 | -0.195725000 |
| 6 | 1.092121000  | -2.273580000 | 1.028321000  |
| 6 | 0.328383000  | -2.593665000 | -0.201287000 |
| 6 | -1.733506000 | -2.053383000 | 1.038236000  |
| 6 | -1.038161000 | -2.481528000 | -0.200729000 |
| 6 | -3.115483000 | -1.958405000 | 1.049213000  |
| 6 | -3.863593000 | -2.204430000 | -0.195234000 |
| 6 | -5.955029000 | -1.688167000 | 0.980312000  |
| 6 | -5.267298000 | -2.131833000 | -0.198391000 |
| 6 | 5.480712000  | -0.292389000 | 1.835296000  |
| 6 | 4.696239000  | -1.483743000 | 1.752604000  |
| 6 | 2.672088000  | -0.062392000 | 1.730225000  |
| 6 | 3.270772000  | -1.361106000 | 1.688496000  |
| 6 | 1.262602000  | 0.047122000  | 1.752147000  |
| 6 | 0.463770000  | -1.158572000 | 1.736457000  |
| 6 | -1.554454000 | 0.222837000  | 1.879483000  |
| 6 | -0.931347000 | -1.073796000 | 1.775580000  |
| 6 | -2.964733000 | 0.318953000  | 1.904881000  |
| 6 | -3.763875000 | -0.873260000 | 1.766099000  |
| 6 | -5.799781000 | 0.500621000  | 1.861921000  |
| 6 | -5.193197000 | -0.782491000 | 1.792547000  |
| 1 | 6.589083000  | -0.041364000 | -1.746390000 |
| 1 | 6.761833000  | 1.386834000  | 0.215209000  |
| 1 | 6.413953000  | -2.418440000 | -1.332423000 |
| 1 | 6.564751000  | -0.372971000 | 1.879566000  |
| 1 | 6.399076000  | -2.633962000 | 1.020911000  |
| 6 | 2.966312000  | 4.394128000  | -0.610409000 |
| 6 | 1.638895000  | 4.491618000  | -0.605807000 |
| 1 | 3.599685000  | 4.948849000  | -1.293913000 |
| 1 | 1.090254000  | 5.134372000  | -1.285435000 |
| 6 | 3.561004000  | 3.432805000  | 0.376633000  |
| 1 | 4.642109000  | 3.367890000  | 0.268211000  |
| 1 | 3.377824000  | 3.776876000  | 1.402250000  |

|   |              |              |              |
|---|--------------|--------------|--------------|
| 6 | 0.911486000  | 3.628231000  | 0.382943000  |
| 1 | -0.164682000 | 3.733656000  | 0.282304000  |
| 1 | 1.152720000  | 3.939468000  | 1.407094000  |
| 1 | -6.785521000 | 2.242160000  | 0.195919000  |
| 1 | -6.857542000 | 0.916622000  | -1.780344000 |
| 1 | -6.883948000 | 0.577381000  | 1.891316000  |
| 1 | -7.023486000 | -1.470937000 | -1.347175000 |
| 1 | -7.040404000 | -1.687844000 | 1.025941000  |

Zero-point correction= 0.563904 (Hartree/Particle)  
 Thermal correction to Energy= 0.594085  
 Thermal correction to Enthalpy= 0.595029  
 Thermal correction to Gibbs Free Energy= 0.512747  
 Sum of electronic and zero-point Energies= -2447.407435  
 Sum of electronic and thermal Energies= -2447.377255  
 Sum of electronic and thermal Enthalpies= -2447.376310  
**Sum of electronic and thermal Free Energies= -2447.458593**  
**Number of imaginary frequencies = 0**

**(5,0) Adduct of 15.63Å**

|   |              |              |              |
|---|--------------|--------------|--------------|
| 6 | -6.682794000 | 1.406604000  | -0.206432000 |
| 6 | -5.909480000 | 0.920337000  | -1.337667000 |
| 6 | -3.914385000 | 2.023662000  | -0.246670000 |
| 6 | -4.495125000 | 1.045256000  | -1.286860000 |
| 6 | -2.319487000 | 2.117766000  | -0.245830000 |
| 6 | -1.622665000 | 1.243280000  | -1.329986000 |
| 6 | 0.479889000  | 1.901982000  | -0.205880000 |
| 6 | -0.235989000 | 1.293169000  | -1.354050000 |
| 6 | 1.852199000  | 1.972534000  | -0.204017000 |
| 6 | 2.611414000  | 1.439543000  | -1.347505000 |
| 6 | 4.704872000  | 2.065854000  | -0.195096000 |
| 6 | 4.007082000  | 1.525245000  | -1.358185000 |
| 6 | 6.118793000  | 2.170489000  | -0.196292000 |
| 6 | 6.857793000  | 1.624029000  | -1.293505000 |
| 6 | -6.518887000 | 0.070301000  | 1.714638000  |
| 6 | -5.924058000 | 1.130131000  | 1.002066000  |
| 6 | -3.706773000 | 0.253962000  | 1.601538000  |
| 6 | -4.508437000 | 1.248077000  | 0.947375000  |
| 6 | -2.292704000 | 0.356428000  | 1.622420000  |
| 6 | -1.636673000 | 1.458860000  | 0.992814000  |
| 6 | 0.522336000  | 0.531955000  | 1.767780000  |
| 6 | -0.250521000 | 1.511789000  | 1.025617000  |
| 6 | 1.928347000  | 0.621392000  | 1.796271000  |
| 6 | 2.597055000  | 1.658537000  | 1.026441000  |
| 6 | 4.767328000  | 0.776300000  | 1.784071000  |
| 6 | 3.992802000  | 1.746522000  | 1.039036000  |
| 6 | 6.198561000  | 0.864160000  | 1.814818000  |
| 6 | 6.843861000  | 1.835271000  | 0.990911000  |
| 6 | -6.370368000 | -2.251855000 | 1.286918000  |
| 6 | -5.743880000 | -1.120619000 | 1.870041000  |

|   |              |              |              |
|---|--------------|--------------|--------------|
| 6 | -3.519605000 | -2.157102000 | 1.353854000  |
| 6 | -4.315055000 | -1.023504000 | 1.798693000  |
| 6 | -2.136707000 | -2.052485000 | 1.335624000  |
| 6 | -1.506970000 | -0.837431000 | 1.845353000  |
| 6 | 0.692671000  | -1.865077000 | 1.357844000  |
| 6 | -0.110413000 | -0.758837000 | 1.887795000  |
| 6 | 2.070722000  | -1.774800000 | 1.366155000  |
| 6 | 2.718935000  | -0.585544000 | 1.919934000  |
| 6 | 4.909783000  | -1.563782000 | 1.326085000  |
| 6 | 4.121492000  | -0.503640000 | 1.941436000  |
| 6 | 6.326635000  | -1.500947000 | 1.350861000  |
| 6 | 6.959589000  | -0.339605000 | 1.882575000  |
| 6 | -6.358054000 | -2.460251000 | -0.986403000 |
| 6 | -5.630195000 | -2.825138000 | 0.196975000  |
| 6 | -3.506234000 | -2.376980000 | -1.038390000 |
| 6 | -4.218417000 | -2.712420000 | 0.194564000  |
| 6 | -2.122770000 | -2.270111000 | -1.023252000 |
| 6 | -1.361418000 | -2.599054000 | 0.201042000  |
| 6 | 0.707109000  | -2.085711000 | -1.044332000 |
| 6 | 0.007569000  | -2.489827000 | 0.199646000  |
| 6 | 2.085515000  | -1.997304000 | -1.052010000 |
| 6 | 2.835276000  | -2.262140000 | 0.196076000  |
| 6 | 4.923962000  | -1.779943000 | -1.017198000 |
| 6 | 4.215291000  | -2.186486000 | 0.197524000  |
| 6 | 6.341192000  | -1.720905000 | -1.034982000 |
| 6 | 7.063579000  | -1.925278000 | 0.191312000  |
| 6 | -6.498012000 | -0.256348000 | -1.844282000 |
| 6 | -5.723799000 | -1.455366000 | -1.761466000 |
| 6 | -3.686625000 | -0.055160000 | -1.733474000 |
| 6 | -4.294902000 | -1.346390000 | -1.694365000 |
| 6 | -2.272967000 | 0.042569000  | -1.754434000 |
| 6 | -1.485358000 | -1.170361000 | -1.741170000 |
| 6 | 0.544771000  | 0.193366000  | -1.893915000 |
| 6 | -0.088008000 | -1.098013000 | -1.778763000 |
| 6 | 1.950892000  | 0.277147000  | -1.920733000 |
| 6 | 2.741570000  | -0.930904000 | -1.808622000 |
| 6 | 4.789701000  | 0.435053000  | -1.901909000 |
| 6 | 4.144612000  | -0.852629000 | -1.826928000 |
| 6 | 6.221011000  | 0.516915000  | -1.931084000 |
| 6 | 6.981432000  | -0.677375000 | -1.764888000 |
| 1 | -7.604118000 | 0.003694000  | 1.752317000  |
| 1 | -7.764882000 | 1.429561000  | -0.215074000 |
| 1 | -7.451563000 | -2.357160000 | 1.327829000  |
| 1 | -7.582760000 | -0.328430000 | -1.885694000 |
| 1 | -7.438990000 | -2.570992000 | -1.018401000 |
| 1 | 7.924774000  | 1.943021000  | 1.021524000  |
| 1 | 8.044508000  | -0.288025000 | 1.927734000  |
| 1 | 7.939076000  | 1.725729000  | -1.330843000 |
| 1 | 8.149217000  | -1.950976000 | 0.200055000  |
| 1 | 8.066863000  | -0.632990000 | -1.804752000 |

|   |              |             |              |
|---|--------------|-------------|--------------|
| 6 | -3.940157000 | 4.398348000 | 0.614817000  |
| 6 | -2.611831000 | 4.484251000 | 0.609025000  |
| 1 | -4.568505000 | 4.957102000 | 1.299737000  |
| 1 | -2.056665000 | 5.120765000 | 1.289282000  |
| 6 | -4.543321000 | 3.445163000 | -0.374600000 |
| 1 | -5.625128000 | 3.389462000 | -0.267221000 |
| 1 | -4.355998000 | 3.788899000 | -1.399611000 |
| 6 | -1.893395000 | 3.617295000 | -0.382563000 |
| 1 | -0.816428000 | 3.713264000 | -0.284332000 |
| 1 | -2.134621000 | 3.931753000 | -1.405773000 |

Zero-point correction= 0.624918 (Hartree/Particle)  
 Thermal correction to Energy= 0.659099  
 Thermal correction to Enthalpy= 0.660043  
 Thermal correction to Gibbs Free Energy= 0.570637  
 Sum of electronic and zero-point Energies= -2828.337921  
 Sum of electronic and thermal Energies= -2828.303740  
 Sum of electronic and thermal Enthalpies= -2828.302796  
**Sum of electronic and thermal Free Energies= -2828.392202**  
**Number of imaginary frequencies = 0**

### Optimized Geometries of [5+4] adduct with different length

#### (5,0) Adduct of 11.34Å

|   |              |              |              |
|---|--------------|--------------|--------------|
| 6 | -4.464312000 | 1.670079000  | -0.230486000 |
| 6 | -3.855707000 | 0.731237000  | -1.299978000 |
| 6 | -1.813607000 | 1.439649000  | -0.198539000 |
| 6 | -2.432693000 | 0.835672000  | -1.312197000 |
| 6 | -0.434311000 | 1.957199000  | -0.218192000 |
| 6 | 0.379566000  | 1.271012000  | -1.353205000 |
| 6 | 2.396001000  | 2.104027000  | -0.196012000 |
| 6 | 1.748033000  | 1.446887000  | -1.351176000 |
| 6 | 3.777283000  | 2.307132000  | -0.197833000 |
| 6 | 4.578441000  | 1.782746000  | -1.269645000 |
| 6 | -4.446367000 | -0.158924000 | 1.591525000  |
| 6 | -3.875633000 | 0.946054000  | 0.994406000  |
| 6 | -1.610183000 | 0.157881000  | 1.755313000  |
| 6 | -2.457353000 | 1.039732000  | 0.998129000  |
| 6 | -0.213611000 | 0.353399000  | 1.736836000  |
| 6 | 0.349081000  | 1.483067000  | 1.039861000  |
| 6 | 2.573880000  | 0.722588000  | 1.740778000  |
| 6 | 1.718654000  | 1.660540000  | 1.041379000  |
| 6 | 3.994445000  | 0.917663000  | 1.756770000  |
| 6 | 4.551244000  | 1.982238000  | 0.968389000  |
| 6 | -4.114083000 | -2.498754000 | 1.240983000  |
| 6 | -3.588630000 | -1.313108000 | 1.812122000  |
| 6 | -1.296338000 | -2.226844000 | 1.358156000  |
| 6 | -2.175253000 | -1.162831000 | 1.855648000  |
| 6 | 0.073002000  | -2.030217000 | 1.351901000  |
| 6 | 0.646003000  | -0.791183000 | 1.886910000  |

|   |              |              |              |
|---|--------------|--------------|--------------|
| 6 | 2.898479000  | -1.626206000 | 1.316784000  |
| 6 | 2.034966000  | -0.604721000 | 1.899608000  |
| 6 | 4.300294000  | -1.450894000 | 1.340934000  |
| 6 | 4.839075000  | -0.223854000 | 1.832810000  |
| 6 | -4.086205000 | -2.699392000 | -0.963123000 |
| 6 | -3.299442000 | -3.098612000 | 0.194935000  |
| 6 | -1.267963000 | -2.439719000 | -1.056854000 |
| 6 | -1.932770000 | -2.877084000 | 0.191356000  |
| 6 | 0.101621000  | -2.242012000 | -1.052167000 |
| 6 | 0.877079000  | -2.488834000 | 0.190479000  |
| 6 | 2.926074000  | -1.833602000 | -1.019889000 |
| 6 | 2.245499000  | -2.308201000 | 0.191687000  |
| 6 | 4.328287000  | -1.662244000 | -1.039507000 |
| 6 | 5.071365000  | -1.828562000 | 0.183830000  |
| 6 | -4.414732000 | -0.457888000 | -1.711886000 |
| 6 | -3.547475000 | -1.629321000 | -1.718630000 |
| 6 | -1.566616000 | -0.163770000 | -1.889717000 |
| 6 | -2.132408000 | -1.482798000 | -1.756909000 |
| 6 | -0.172018000 | 0.036166000  | -1.865008000 |
| 6 | 0.689801000  | -1.115968000 | -1.784523000 |
| 6 | 2.618001000  | 0.403865000  | -1.856150000 |
| 6 | 2.078683000  | -0.931645000 | -1.793489000 |
| 6 | 4.038067000  | 0.595563000  | -1.871787000 |
| 6 | 4.882016000  | -0.540108000 | -1.726111000 |
| 1 | -5.522701000 | -0.312285000 | 1.546052000  |
| 1 | -5.553534000 | 1.604195000  | -0.233989000 |
| 1 | -5.179541000 | -2.706855000 | 1.295284000  |
| 1 | -5.491004000 | -0.608273000 | -1.656867000 |
| 1 | -5.149935000 | -2.918383000 | -1.006390000 |
| 6 | -3.088764000 | 3.859920000  | 0.588335000  |
| 6 | -1.753458000 | 4.038137000  | 0.592086000  |
| 1 | -3.616381000 | 4.283574000  | 1.440661000  |
| 1 | -1.355736000 | 4.581175000  | 1.445365000  |
| 6 | -4.007534000 | 3.190294000  | -0.430414000 |
| 1 | -4.925151000 | 3.785085000  | -0.457865000 |
| 1 | -3.565885000 | 3.270867000  | -1.425180000 |
| 6 | -0.695407000 | 3.517577000  | -0.371770000 |
| 1 | 0.245106000  | 4.051083000  | -0.225008000 |
| 1 | -1.006254000 | 3.667712000  | -1.409309000 |
| 1 | 5.641571000  | 1.996379000  | -1.329687000 |
| 1 | 5.612925000  | 2.205926000  | 1.016387000  |
| 1 | 5.960888000  | -0.409803000 | -1.759636000 |
| 1 | 5.917106000  | -0.087083000 | 1.867608000  |
| 1 | 6.156137000  | -1.781484000 | 0.192054000  |

|                                            |                             |
|--------------------------------------------|-----------------------------|
| Zero-point correction=                     | 0.502995 (Hartree/Particle) |
| Thermal correction to Energy=              | 0.529229                    |
| Thermal correction to Enthalpy=            | 0.530173                    |
| Thermal correction to Gibbs Free Energy=   | 0.454971                    |
| Sum of electronic and zero-point Energies= | -2066.478376                |

Sum of electronic and thermal Energies= -2066.452143  
Sum of electronic and thermal Enthalpies= -2066.451199  
**Sum of electronic and thermal Free Energies= -2066.526401**  
**Number of imaginary frequencies = 0**

**(5,0) Adduct of 13.49Å**

|   |              |              |              |
|---|--------------|--------------|--------------|
| 6 | -5.409654000 | 1.795628000  | -0.228290000 |
| 6 | -4.835816000 | 0.836638000  | -1.300351000 |
| 6 | -2.769141000 | 1.470657000  | -0.198268000 |
| 6 | -3.409075000 | 0.888391000  | -1.311199000 |
| 6 | -1.369498000 | 1.928690000  | -0.215893000 |
| 6 | -0.580036000 | 1.219202000  | -1.354595000 |
| 6 | 1.471804000  | 1.969745000  | -0.192369000 |
| 6 | 0.793036000  | 1.340726000  | -1.351242000 |
| 6 | 2.844772000  | 2.101433000  | -0.192237000 |
| 6 | 3.630505000  | 1.589893000  | -1.317687000 |
| 6 | 5.704776000  | 2.278919000  | -0.182091000 |
| 6 | 5.041721000  | 1.741702000  | -1.338813000 |
| 6 | -5.459243000 | -0.033906000 | 1.591920000  |
| 6 | -4.848173000 | 1.050051000  | 0.997021000  |
| 6 | -2.612896000 | 0.177303000  | 1.750789000  |
| 6 | -3.426901000 | 1.091035000  | 0.997935000  |
| 6 | -1.206668000 | 0.321578000  | 1.734239000  |
| 6 | -0.603262000 | 1.430983000  | 1.045356000  |
| 6 | 1.585730000  | 0.598781000  | 1.786241000  |
| 6 | 0.771048000  | 1.552934000  | 1.046604000  |
| 6 | 2.987382000  | 0.740141000  | 1.801331000  |
| 6 | 3.610078000  | 1.794716000  | 1.018070000  |
| 6 | 5.810715000  | 1.001718000  | 1.751300000  |
| 6 | 5.021352000  | 1.950785000  | 1.039195000  |
| 6 | -5.211230000 | -2.386638000 | 1.239438000  |
| 6 | -4.646176000 | -1.220362000 | 1.801976000  |
| 6 | -2.384610000 | -2.214315000 | 1.352430000  |
| 6 | -3.222261000 | -1.120494000 | 1.843024000  |
| 6 | -1.006024000 | -2.062778000 | 1.340999000  |
| 6 | -0.390196000 | -0.853459000 | 1.894683000  |
| 6 | 1.832264000  | -1.778440000 | 1.342642000  |
| 6 | 1.001383000  | -0.718986000 | 1.912338000  |
| 6 | 3.213728000  | -1.644088000 | 1.352113000  |
| 6 | 3.820819000  | -0.434099000 | 1.880447000  |
| 6 | 6.046875000  | -1.302375000 | 1.277441000  |
| 6 | 5.245005000  | -0.294424000 | 1.909533000  |
| 6 | -5.190807000 | -2.586642000 | -0.968155000 |
| 6 | -4.419796000 | -3.017364000 | 0.191833000  |
| 6 | -2.363657000 | -2.425454000 | -1.056980000 |
| 6 | -3.045662000 | -2.840782000 | 0.188127000  |
| 6 | -0.985090000 | -2.272016000 | -1.047363000 |
| 6 | -0.214941000 | -2.560235000 | 0.188550000  |
| 6 | 1.853315000  | -1.987988000 | -1.045689000 |
| 6 | 1.154447000  | -2.412087000 | 0.188644000  |

|   |              |              |              |
|---|--------------|--------------|--------------|
| 6 | 3.234918000  | -1.855141000 | -1.053205000 |
| 6 | 3.991584000  | -2.082122000 | 0.185390000  |
| 6 | 6.066803000  | -1.501190000 | -0.989816000 |
| 6 | 5.394326000  | -1.967221000 | 0.187695000  |
| 6 | -5.438318000 | -0.330550000 | -1.712188000 |
| 6 | -4.616506000 | -1.532251000 | -1.710894000 |
| 6 | -2.580651000 | -0.142003000 | -1.886398000 |
| 6 | -3.190741000 | -1.436461000 | -1.747853000 |
| 6 | -1.176193000 | 0.007054000  | -1.862735000 |
| 6 | -0.357502000 | -1.177443000 | -1.793556000 |
| 6 | 1.619378000  | 0.274977000  | -1.901822000 |
| 6 | 1.034062000  | -1.045620000 | -1.806341000 |
| 6 | 3.020160000  | 0.413575000  | -1.916176000 |
| 6 | 3.853255000  | -0.755571000 | -1.774962000 |
| 6 | 5.842575000  | 0.684730000  | -1.860447000 |
| 6 | 5.277550000  | -0.620120000 | -1.801438000 |
| 1 | -6.540478000 | -0.147584000 | 1.544211000  |
| 1 | -6.500584000 | 1.770812000  | -0.232137000 |
| 1 | -6.285145000 | -2.548850000 | 1.286407000  |
| 1 | -6.519299000 | -0.441379000 | -1.654106000 |
| 1 | -6.263442000 | -2.758891000 | -1.006032000 |
| 6 | -3.952146000 | 3.931786000  | 0.593350000  |
| 6 | -2.610810000 | 4.058765000  | 0.595517000  |
| 1 | -4.462967000 | 4.376034000  | 1.445414000  |
| 1 | -2.191471000 | 4.587470000  | 1.447471000  |
| 6 | -4.895737000 | 3.298356000  | -0.425866000 |
| 1 | -5.790841000 | 3.926656000  | -0.452045000 |
| 1 | -4.451947000 | 3.363372000  | -1.420775000 |
| 6 | -1.574738000 | 3.498353000  | -0.369653000 |
| 1 | -0.613134000 | 3.993657000  | -0.223121000 |
| 1 | -1.879621000 | 3.660996000  | -1.407099000 |
| 1 | 6.774878000  | 2.463112000  | -0.189311000 |
| 1 | 6.923379000  | 0.797562000  | -1.895151000 |
| 1 | 6.890851000  | 1.121031000  | 1.786550000  |
| 1 | 7.151703000  | -1.465314000 | -1.033771000 |
| 1 | 7.130851000  | -1.258394000 | 1.333901000  |

Zero-point correction= 0.564871 (Hartree/Particle)  
 Thermal correction to Energy= 0.594934  
 Thermal correction to Enthalpy= 0.595879  
 Thermal correction to Gibbs Free Energy= 0.513905  
 Sum of electronic and zero-point Energies= -2447.412169  
 Sum of electronic and thermal Energies= -2447.382106  
 Sum of electronic and thermal Enthalpies= -2447.381161  
**Sum of electronic and thermal Free Energies= -2447.463135**  
**Number of imaginary frequencies = 0**

**(5,0) Adduct of 15.63Å**

|   |              |             |              |
|---|--------------|-------------|--------------|
| 6 | -6.390565000 | 1.886785000 | -0.226471000 |
| 6 | -5.837613000 | 0.917044000 | -1.300744000 |



|   |              |              |              |
|---|--------------|--------------|--------------|
| 6 | -3.757190000 | 1.506833000  | -0.197552000 |
| 6 | -4.412433000 | 0.937596000  | -1.312162000 |
| 6 | -2.346362000 | 1.931025000  | -0.214070000 |
| 6 | -1.571925000 | 1.201686000  | -1.349833000 |
| 6 | 0.497569000  | 1.913883000  | -0.190462000 |
| 6 | -0.195008000 | 1.289781000  | -1.344457000 |
| 6 | 1.870323000  | 1.997363000  | -0.188740000 |
| 6 | 2.642384000  | 1.489817000  | -1.340640000 |
| 6 | 4.720808000  | 2.156961000  | -0.183208000 |
| 6 | 4.031862000  | 1.599998000  | -1.349200000 |
| 6 | 6.126997000  | 2.288345000  | -0.185403000 |
| 6 | 6.879669000  | 1.758001000  | -1.282776000 |
| 6 | -6.481448000 | 0.052836000  | 1.588012000  |
| 6 | -5.845730000 | 1.127111000  | 0.998103000  |
| 6 | -3.632241000 | 0.194026000  | 1.729987000  |
| 6 | -4.425665000 | 1.137106000  | 0.998531000  |
| 6 | -2.216678000 | 0.308676000  | 1.714829000  |
| 6 | -1.590978000 | 1.412665000  | 1.045649000  |
| 6 | 0.578412000  | 0.530756000  | 1.793472000  |
| 6 | -0.213090000 | 1.500508000  | 1.045164000  |
| 6 | 1.979575000  | 0.641292000  | 1.811719000  |
| 6 | 2.626139000  | 1.698746000  | 1.043702000  |
| 6 | 4.810978000  | 0.847294000  | 1.789055000  |
| 6 | 4.015655000  | 1.810617000  | 1.052838000  |
| 6 | 6.238488000  | 0.962908000  | 1.816093000  |
| 6 | 6.864152000  | 1.958237000  | 0.997340000  |
| 6 | -6.286243000 | -2.308843000 | 1.236457000  |
| 6 | -5.697095000 | -1.151516000 | 1.788883000  |
| 6 | -3.454579000 | -2.202753000 | 1.349799000  |
| 6 | -4.267217000 | -1.085338000 | 1.828430000  |
| 6 | -2.072157000 | -2.077082000 | 1.333922000  |
| 6 | -1.431033000 | -0.880116000 | 1.882913000  |
| 6 | 0.774871000  | -1.856528000 | 1.346041000  |
| 6 | -0.032813000 | -0.774817000 | 1.900586000  |
| 6 | 2.155765000  | -1.744236000 | 1.350208000  |
| 6 | 2.787476000  | -0.554716000 | 1.918135000  |
| 6 | 4.994725000  | -1.486210000 | 1.314334000  |
| 6 | 4.189754000  | -0.447401000 | 1.937910000  |
| 6 | 6.412134000  | -1.397183000 | 1.338466000  |
| 6 | 7.021686000  | -0.224416000 | 1.872729000  |
| 6 | -6.270472000 | -2.507113000 | -0.971625000 |
| 6 | -5.507007000 | -2.958502000 | 0.188256000  |
| 6 | -3.437974000 | -2.412863000 | -1.060033000 |
| 6 | -4.129514000 | -2.813633000 | 0.184973000  |
| 6 | -2.056006000 | -2.285048000 | -1.046447000 |
| 6 | -1.290358000 | -2.597946000 | 0.186254000  |
| 6 | 0.791810000  | -2.066187000 | -1.052862000 |
| 6 | 0.082105000  | -2.464682000 | 0.185471000  |
| 6 | 2.172480000  | -1.954954000 | -1.056173000 |
| 6 | 2.927879000  | -2.211905000 | 0.184179000  |

|   |              |              |              |
|---|--------------|--------------|--------------|
| 6 | 5.010879000  | -1.691914000 | -1.026492000 |
| 6 | 4.310512000  | -2.111235000 | 0.185096000  |
| 6 | 6.428095000  | -1.606505000 | -1.045012000 |
| 6 | 7.154039000  | -1.804897000 | 0.178194000  |
| 6 | -6.466489000 | -0.239950000 | -1.708367000 |
| 6 | -5.674227000 | -1.457300000 | -1.701109000 |
| 6 | -3.607520000 | -0.118626000 | -1.863272000 |
| 6 | -4.242604000 | -1.395896000 | -1.736991000 |
| 6 | -2.192732000 | 0.000461000  | -1.840361000 |
| 6 | -1.405291000 | -1.199522000 | -1.784644000 |
| 6 | 0.605237000  | 0.208018000  | -1.906614000 |
| 6 | -0.007185000 | -1.097266000 | -1.797315000 |
| 6 | 2.005748000  | 0.315084000  | -1.923830000 |
| 6 | 2.813787000  | -0.881068000 | -1.813466000 |
| 6 | 4.836076000  | 0.525180000  | -1.897439000 |
| 6 | 4.215620000  | -0.776797000 | -1.831137000 |
| 6 | 6.263689000  | 0.635663000  | -1.924632000 |
| 6 | 7.046397000  | -0.542868000 | -1.765554000 |
| 1 | -7.564851000 | -0.036407000 | 1.538241000  |
| 1 | -7.481683000 | 1.886706000  | -0.230658000 |
| 1 | -7.363132000 | -2.449233000 | 1.285100000  |
| 1 | -7.549517000 | -0.326329000 | -1.647623000 |
| 1 | -7.346260000 | -2.657656000 | -1.011428000 |
| 1 | 7.940327000  | 2.102157000  | 1.036529000  |
| 1 | 8.105669000  | -0.150828000 | 1.911387000  |
| 1 | 7.956596000  | 1.893448000  | -1.331167000 |
| 1 | 8.240131000  | -1.801422000 | 0.184947000  |
| 1 | 8.130816000  | -0.475764000 | -1.802587000 |
| 6 | -4.884834000 | 3.987688000  | 0.599391000  |
| 6 | -3.540953000 | 4.085214000  | 0.600381000  |
| 1 | -5.385372000 | 4.441417000  | 1.452493000  |
| 1 | -3.109156000 | 4.604307000  | 1.451976000  |
| 6 | -5.842482000 | 3.377956000  | -0.421143000 |
| 1 | -6.723015000 | 4.026423000  | -0.446349000 |
| 1 | -5.397346000 | 3.434359000  | -1.415955000 |
| 6 | -2.518158000 | 3.504163000  | -0.367035000 |
| 1 | -1.545059000 | 3.976275000  | -0.220172000 |
| 1 | -2.819577000 | 3.675605000  | -1.404134000 |

|                                                     |                             |
|-----------------------------------------------------|-----------------------------|
| Zero-point correction=                              | 0.626168 (Hartree/Particle) |
| Thermal correction to Energy=                       | 0.660167                    |
| Thermal correction to Enthalpy=                     | 0.661111                    |
| Thermal correction to Gibbs Free Energy=            | 0.572203                    |
| Sum of electronic and zero-point Energies=          | -2828.344588                |
| Sum of electronic and thermal Energies=             | -2828.310589                |
| Sum of electronic and thermal Enthalpies=           | -2828.309645                |
| <b>Sum of electronic and thermal Free Energies=</b> | <b>-2828.398553</b>         |
| <b>Number of imaginary frequencies = 0</b>          |                             |
